# Supplementary material for: Repertoire of Protein Kinases Encoded in the Genome ofTakifugu rubripes
Source: Hindawi journal article supplement (doi:10.1155/2012/258284), 2012-01-01
Supplement: f3 [file 258284.f3.pdf]

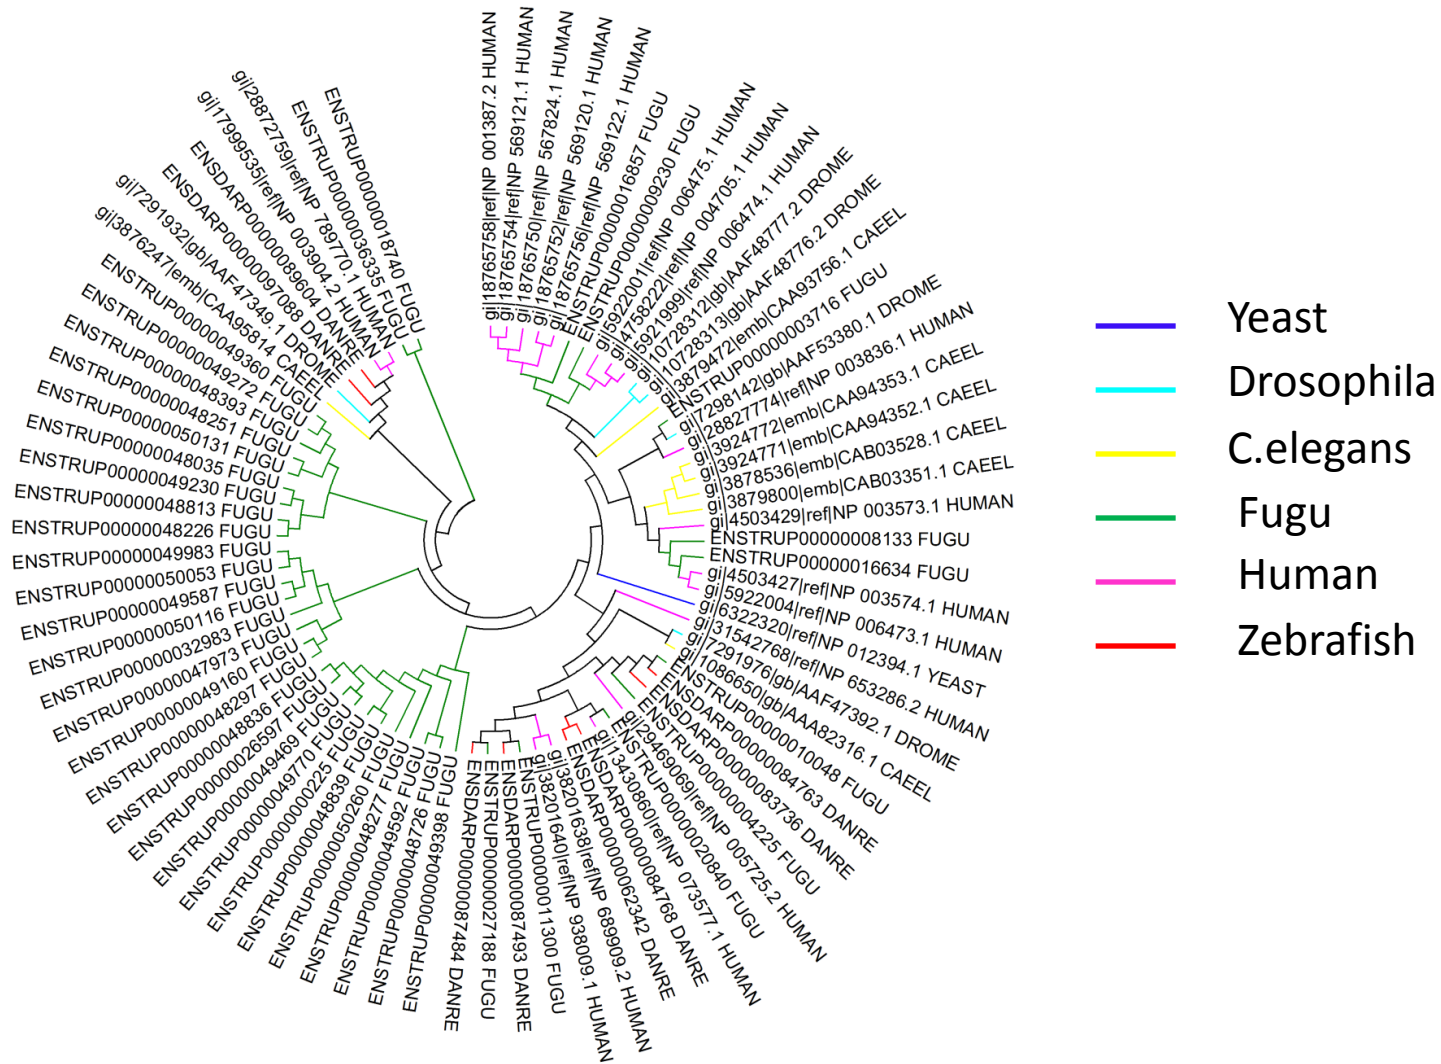

### Supplementary file 3

Dendrogram depicting clustering of kinases of Dual specificity tyrosine regulated kinases(DYRK) subfamily from fugu, human, yeast, Drosophila, C.elegans and Zebrafish
