# Supplementary material for: Repertoire of Protein Kinases Encoded in the Genome of Takifugu rubripes
Source: Comp Funct Genomics. 2012 May 14;2012:258284. doi: 10.1155/2012/258284 (PMC3359783; doi:10.1155/2012/258284)
Supplement: Supplementary file 1 — Supplementary data 1 provides a list of all the 519 protein kinase like sequences encoded in the fugu genome along with their subfamily distribution, domain combination and information on presence of transmembrane helices. Supplementary data 2 presents percentage-wise distribution of all the subfamilies of protein kinases encoded in fugu genome in comparison to other model organisms. Supplementary data 3 shows a dendrogram depicting clustering of kinases of Dual specificity tyrosine regulated kinases (DYRK) subfamily from fugu, human, yeast, Drosophila, C.elegans and Zebrafish. Supplementary data 4 gives the results of BLAST search, in SWISSPROT database, for each of fugu protein kinase sequences belonging to DYRK subfamily. [file 258284.f1.xls]

## Sheet: Sheet1
Supplementary file 1: List of fugu kinases along with information on domain combination and kinase subfamily
Gene identification number	Number of TM helices	domainname|domain start|domain end|e-value	subfamily_group
ENSTRUP00000000125	0	Pkinase|16|226|7.4e-57	MAST1_Mm_AGC_MAST
ENSTRUP00000000198	0	Pkinase|137|418|6.8e-91	PCTAIRE3_Mm_CMGC_CDK
ENSTRUP00000000225	0	Pkinase|24|308|5.6e-26	HIPK3_Mm_CMGC_DYRK
ENSTRUP00000000333	0	PB1|43|122|8e-19	Pkinase|369|629|1.9e-84	MAP3K2_Hs_STE_STE11
ENSTRUP00000000615	0	Pkinase|24|319|1.7e-77	JNK3_Hs_CMGC_MAPK
ENSTRUP00000000659	0	Pkinase|21|274|2e-105	CaMK1b_Hs_CAMK_CAMK1
ENSTRUP00000000682	0	Pkinase|17|252|2.3e-08	Other_Unclassified
ENSTRUP00000000783	0	C1_1|39|92|3.8e-22	C1_1|113|165|4.4e-24	Pkinase|276|536|1.4e-83	Pkinase_C|556|602|1.8e-16	PKCeps_Mm_AGC_PKC
ENSTRUP00000000859	0	Pkinase|163|479|1.8e-69	CLK4_Hs_CMGC_CLK
ENSTRUP00000000963	0	Pkinase|20|270|1.7e-94	YSK1_Mm_STE_STE20
ENSTRUP00000001342	0	Pkinase|33|303|3.3e-89	Pkinase_C|323|366|3.4e-10	Pkinase|410|670|1.3e-73	MSK2_Mm_AGC_RSK
ENSTRUP00000001458	0	V-set|5|98|0.00089	I-set|6|97|1e-33	PKD|12|97|0.23	ig|20|82|0.0065	I-set|104|193|5e-31	V-set|104|194|0.02	ig|118|178|0.13	I-set|375|464|6.6e-30	V-set|375|465|0.0016	ig|389|449|2.7e-05	I-set|491|582|7.4e-24	ig|505|567|0.066	I-set|619|701|0.00049	ig|628|686|0.27	I-set|755|845|3.8e-23	ig|769|830|0.12	I-set|854|945|1.3e-17	ig|868|930|0.21	I-set|1001|1092|7.2e-13	Mastoparan_2|1034|1047|1.7e+02	I-set|1140|1228|9.9e-21	V-set|1140|1229|0.056	ig|1154|1213|0.49	I-set|1378|1468|4.3e-16	ig|1392|1453|2	I-set|1474|1562|2.8e-05	ig|1489|1548|0.00057	I-set|1567|1651|0.00032	I-set|1656|1742|1.3e-05	ig|1670|1729|1.8	Mastoparan_2|1687|1699|1.9e+02	I-set|1745|1830|9.6e-09	ig|1759|1819|0.38	I-set|1833|1917|3.2e-05	ig|1847|1906|0.61	I-set|1920|2004|0.00075	ig|1934|1993|0.12	I-set|2007|2092|9.1e-07	I-set|2095|2179|4.7e-07	ig|2109|2168|0.14	I-set|2182|2266|8.6e-11	ig|2196|2255|1.6	I-set|2269|2353|1.8e-09	ig|2283|2342|0.93	I-set|2358|2443|5.9e-13	ig|2372|2432|0.0038	I-set|2448|2533|0.00027	I-set|2539|2628|1.8e-28
ENSTRUP00000001469	1	LRR_1|60|83|53	LRR_1|85|107|7.6	LRR_1|109|131|0.32	I-set|189|275|3.8e-05	Pkinase|517|808|1.9e-45	TRKA_Mm_TK_Trk
ENSTRUP00000001540	0	cNMP_binding|45|130|3.6e-20	cNMP_binding|163|253|1.6e-14	Pkinase|277|535|5.7e-87	PKG2_Mm_AGC_PKG
ENSTRUP00000001673	0	RGS|52|170|1.2e-27	Pkinase|186|457|3.1e-64	GPRK7_Hs_AGC_GRK
ENSTRUP00000001808	0	PH|2|97|1.2e-07	Pkinase|138|395|5.9e-110	Pkinase_C|415|467|2e-12	AKT2_Mm_AGC_Akt
ENSTRUP00000001826	0	Pkinase|13|217|9.7e-33	DCAMKL2_Mm_CAMK_DCAMKL
ENSTRUP00000001827	0	Pkinase|1|212|2.2e-69	RSK1_Mm_AGC_RSK
ENSTRUP00000001925	0	Pkinase|40|291|5e-79	NIM1_Mm_CAMK_CAMKL
ENSTRUP00000002102	0	Pkinase|33|294|4e-68	NEK7_Mm_Other_NEK
ENSTRUP00000002156	0	C1_1|35|87|3.6e-21	C1_1|100|152|2.3e-24	C1_3|111|142|0.0099	C2|171|258|6.1e-37	Pkinase|337|595|8.5e-78	Pkinase_C|615|660|1.1e-11	PKCa_Hs_AGC_PKC
ENSTRUP00000002158	0	Pkinase|6|264|1e-78	PKCa_Hs_AGC_PKC
ENSTRUP00000002233	0	Pkinase|26|277|4.8e-88	MST1_Mm_STE_STE20
ENSTRUP00000002423	0	RGS|52|170|7.4e-31	Pkinase|186|448|8.4e-78	GPRK6_Hs_AGC_GRK
ENSTRUP00000002505	0	Pkinase|664|927|2.7e-77	MAP3K5_Mm_STE_STE11
ENSTRUP00000002556	1	Ephrin_lbd|28|200|2.6e-84	GCC2_GCC3|261|303|0.05	fn3|325|413|2.7e-08	fn3|440|529|3.7e-16	Pkinase|624|881|1.5e-44	SAM_2|911|978|2.2e-16	SAM_1|912|976|2.6e-28	EphB4_Mm_TK_Eph
ENSTRUP00000002600	0	SH3_1|49|108|8.2e-15	SH3_2|50|108|3e-06	SH2|116|193|4e-25	Pkinase|233|483|8.5e-41	BRK_Mm_TK_Src
ENSTRUP00000002603	0	SH3_1|52|108|3.4e-12	SH3_2|53|108|4e-05	SH2|117|194|4.8e-31	Pkinase|228|488|1.1e-54	LYN_Mm_TK_Src
ENSTRUP00000002807	0	cNMP_binding|200|291|1e-21	Pkinase|321|550|1.5e-64	PKG1_Hs_AGC_PKG
ENSTRUP00000002808	0	Pkinase|9|196|3.7e-32	PKG1_Sp_AGC_PKG
ENSTRUP00000002905	0	Pkinase|5|258|1.6e-94	SNRK_Mm_CAMK_CAMKL
ENSTRUP00000003003	0	Pkinase|1|192|3.8e-19	PDZ|521|606|1.9e-09	Other_Unclassified
ENSTRUP00000003155	0	Pkinase|37|295|6.9e-87	LOK_Mm_STE_STE20
ENSTRUP00000003395	0	Pkinase|651|956|1.4e-76	Pkinase_C|975|1029|0.0033	LATS1_Hs_AGC_NDR
ENSTRUP00000003428	0	Pkinase|39|294|1.2e-79	CDKL1_Mm_CMGC_CDKL
ENSTRUP00000003616	0	Pkinase|76|339|7.2e-34	BIKE_Mm_Other_NAK
ENSTRUP00000003680	0	Pkinase|138|400|1.9e-37	SH3_1|410|461|0.0012	GTPase_binding|462|529|3e-44	UBA|1025|1063|1.6e-06	ACK_Mm_TK_Ack
ENSTRUP00000003716	0	Pkinase|201|497|5.1e-74	5306_Tt_CMGC_DYRK
ENSTRUP00000003758	0	SH3_1|2|63|1.8e-19	SH3_2|3|63|1.5e-06	SH2|70|150|1.6e-39	Pkinase|186|439|2e-45	LYN_Mm_TK_Src
ENSTRUP00000003763	0	Pkinase|48|300|3.2e-93	POLO_box|474|537|7.4e-17	POLO_box|570|642|1.3e-16	PLK3_Mm_Other_PLK
ENSTRUP00000003920	0	HR1|36|108|1.4e-22	HR1|125|202|7.6e-20	HR1|210|287|3.6e-13	Pkinase|652|911|4.1e-85	Pkinase_C|931|978|3.5e-14	PKN2_Mm_AGC_PKN
ENSTRUP00000004139	1	Ephrin_lbd|1|173|1.1e-135	fn3|297|399|3.3e-10	fn3|415|499|2.2e-18	Pkinase|600|857|6.7e-43	SAM_2|878|945|1.6e-11	SAM_1|879|943|9.6e-15	EphB4_Mm_TK_Eph
ENSTRUP00000004157	1	Activin_recp|14|98|5.9e-09	Pkinase|173|547|1.8e-40	Other_Unclassified
ENSTRUP00000004225	0	Pkinase|10|329|1.4e-54	HIPK3_Mm_CMGC_DYRK
ENSTRUP00000004326	0	Pkinase|22|292|1.2e-36	Ank|432|464|0.00026	Ank|465|498|0.0018	Ank|499|531|7.6e-08	Ank|532|564|1.9e-08	Ank|565|598|7.6e-08	Ank|599|631|1.4e-09	Ank|632|664|8.3e-07	Ank|665|697|1e-08	Ank|698|730|0.02	Ank|737|769|2.6	ANKRD3_Mm_TKL_RIPK
ENSTRUP00000004446	0	RBD|23|95|1.4e-32	C1_1|103|151|6e-15	C1_3|114|141|0.092	Pkinase|302|558|1.2e-78	ARAF_Mm_TKL_RAF
ENSTRUP00000004704	0	Pkinase|1|212|8e-21	LYN_Mm_TK_Src
ENSTRUP00000005089	0	Pkinase|9|277|4.8e-36	IKKe_Mm_Other_IKK
ENSTRUP00000005454	0	|hits|above|	Other_Unclassified
ENSTRUP00000005820	0	Pkinase|1|147|8.2e-09	18315_Tt_Other_ULK
ENSTRUP00000005963	0	Pkinase|5|347|5.7e-45	CLIK1_Hs_Other_NKF4
ENSTRUP00000006091	0	Pkinase|94|362|1.8e-59	OSR1_Mm_STE_STE20
ENSTRUP00000006203	1	LRR_1|102|124|18	LRR_1|126|148|0.084	LRR_1|195|217|2.8e+02	I-set|207|297|0.0069	Pkinase|540|812|5.5e-52	TRKC_Mm_TK_Trk
ENSTRUP00000006408	0	Pkinase|2|201|2.4e-15	EphA5_Hs_TK_Eph
ENSTRUP00000006466	0	Pkinase|98|355|8.6e-91	Pkinase_C|375|427|8e-11	SGK1_Mm_AGC_SGK
ENSTRUP00000006484	0	Pkinase|8|272|1.7e-43	PKR_Hs_Other_PEK
ENSTRUP00000006486	0	Pkinase|7|265|1.2e-46	PKR_Hs_Other_PEK
ENSTRUP00000006496	0	Pkinase|658|922|3e-76	TTK_Mm_Other_TTK
ENSTRUP00000006559	0	Pkinase|14|265|1.4e-90	NuaK1_Mm_CAMK_CAMKL
ENSTRUP00000006640	0	Pkinase|28|281|1.3e-75	TAO2_Mm_STE_STE20
ENSTRUP00000006673	1	ig|45|94|6.2	I-set|218|311|0.0068	V-set|219|312|0.00036	ig|232|296|0.00012	V-set|379|474|0.016	Pkinase|641|959|8.9e-40	FLT3_Hs_TK_PDGFR
ENSTRUP00000006765	0	Pkinase|62|330|1.1e-45	MOS_Mm_Other_MOS
ENSTRUP00000006781	0	Pkinase|47|247|1.2e-16	SgK496_Hs_Other_SgK496
ENSTRUP00000006798	0	Pkinase|1|193|1.1e-12	Other_Unclassified
ENSTRUP00000007046	0	Pkinase|1|172|1.7e-09	Kdo|255|460|3e-05	PRPK_Mm_Other_Bud32
ENSTRUP00000007128	0	SH3_1|102|158|6.4e-29	SH3_2|103|158|3.9e-13	SH2|166|248|3.8e-43	Pkinase|285|534|2.5e-45	YES_Mm_TK_Src
ENSTRUP00000007140	0	Pkinase|4|285|5.4e-112	CDC2_Mm_CMGC_CDK
ENSTRUP00000007278	0	Pkinase|3|214|2.5e-10	ROR1_Mm_TK_Ror
ENSTRUP00000007523	0	RGS|50|167|2.6e-26	Pkinase|183|445|3.3e-72	GPRK5_Hs_AGC_GRK
ENSTRUP00000007801	0	Pkinase|14|272|2.2e-98	CaMKII_AD|462|589|3.3e-85	CaMK2g_Hs_CAMK_CAMK2
ENSTRUP00000007875	1	I-set|1|82|7.1e-14	ig|9|66|2.9e-07	Fz|97|206|6.3e-07	Kringle|245|323|8.5e-32	Pkinase|434|712|3.2e-39	MUSK_Mm_TK_Musk
ENSTRUP00000007894	0	Pkinase|206|479|1.7e-50	Wee1B_Mm_Other_WEE
ENSTRUP00000008133	0	Pkinase|217|530|3.4e-71	DYRK2_Hs_CMGC_DYRK
ENSTRUP00000008183	0	Pkinase|34|304|4.9e-17	PBK_Mm_Other_TOPK
ENSTRUP00000008187	0	HR1|43|114|4.3e-18	HR1|130|207|1.3e-18	HR1|214|291|4.8e-19	Pkinase|612|871|1.2e-82	Pkinase_C|891|938|2.9e-15	PKN2_Mm_AGC_PKN
ENSTRUP00000008199	0	Pkinase|63|328|1.2e-64	MKK4_Sp_STE_STE7
ENSTRUP00000008306	0	Pkinase|1|214|4e-15	YES_Mm_TK_Src
ENSTRUP00000008516	0	PH|6|107|9.6e-20	Pkinase|148|405|2.6e-110	Pkinase_C|425|477|5.6e-13	AKT2_Mm_AGC_Akt
ENSTRUP00000008584	1	V-set|3|89|0.003	ig|19|74|1.1e-08	V-set|120|210|0.0062	I-set|121|209|3.3e-09	ig|133|194|9.7e-07	I-set|217|319|7.5e-06	V-set|221|320|0.0018	ig|231|304|3.9e-05	Pkinase|431|706|2.1e-42	FGFR3_Mm_TK_FGFR
ENSTRUP00000008608	0	I-set|2|85|2.7e-24	ig|16|70|0.0083	I-set|573|663|1e-18	V-set|574|666|0.0056	ig|587|648|3.9e-06	I-set|669|758|8.3e-25	ig|683|743|1.3e-06	V-set|794|885|0.047	I-set|795|884|2.5e-21	ig|809|869|3e-06	fn3|889|978|2.4e-10	I-set|997|1087|0.00012	I-set|1091|1180|1.1e-31	V-set|1093|1181|0.016	ig|1105|1165|5.4e-05	Pkinase|1208|1459|1.7e-56	I-set|2290|2380|1.8e-20	V-set|2290|2383|0.055	ig|2304|2365|9.1e-09	fn3|2384|2466|1e-07	Pkinase|2647|2899|1.5e-64	SPEG_Mm_CAMK_Trio
ENSTRUP00000008609	0	I-set|2|84|1.6e-19	ig|16|69|0.0083	V-set|593|687|0.033	I-set|594|684|9.6e-11	ig|608|669|6.3e-05	I-set|690|779|3.4e-28	V-set|690|780|0.0027	ig|704|764|2.6e-07	I-set|816|905|1.4e-20	ig|830|890|0.0027	fn3|910|999|3.4e-06	I-set|1018|1108|0.00026	I-set|1112|1201|1.8e-34	V-set|1122|1202|0.044	ig|1126|1186|0.019	Pkinase|1234|1485|1.1e-56	I-set|2266|2356|6.6e-18	V-set|2266|2358|0.016	ig|2280|2341|2.9e-09	fn3|2360|2442|8.9e-05	Pkinase|2644|2897|3.7e-63	SPEG_Mm_CAMK_Trio
ENSTRUP00000008637	0	Pkinase|51|312|5.3e-78	MAPKAPK2_Mm_CAMK_MAPKAPK
ENSTRUP00000008797	0	Pkinase|25|289|5.5e-83	CNH|1007|1298|5.1e-101	TNIK_Hs_STE_STE20
ENSTRUP00000008843	0	I-set|1|90|1.8e-21	ig|15|75|2.3e-07	I-set|125|218|2.3e-06	ig|142|203|2.2	fn3|222|306|1.3e-18	Pkinase|351|605|1.5e-44	I-set|687|775|1.8e-23	ig|701|760|1.5	TTN_Mm_CAMK_MLCK
ENSTRUP00000009007	0	Pkinase|87|380|1.3e-78	Pkinase_C|398|450|1.3e-10	NDR2_Mm_AGC_NDR
ENSTRUP00000009010	0	Pkinase|6|264|9.5e-92	Pkinase_C|287|332|3.2e-12	p70S6Kb_Mm_AGC_RSK
ENSTRUP00000009191	0	SH3_1|45|104|1.8e-16	SH3_2|46|104|1.9e-08	Pkinase|135|394|5.5e-84	MLK1_Mm_TKL_MLK
ENSTRUP00000009230	0	Pkinase|113|433|1e-61	DYRK1A_Hs_CMGC_DYRK
ENSTRUP00000009388	1	Ephrin_lbd|1|155|2.1e-111	fn3|280|373|1.6e-06	fn3|391|475|9.7e-13	Pkinase|579|836|4.1e-39	SAM_2|867|934|5e-19	SAM_1|868|932|1.1e-25	EphB4_Mm_TK_Eph
ENSTRUP00000009402	0	Pkinase|20|335|1.4e-72	CDK8_Mm_CMGC_CDK
ENSTRUP00000009404	0	Pkinase|67|348|2.1e-32	CARD|520|607|3.2e-17	RIPK2_Mm_TKL_RIPK
ENSTRUP00000009538	0	Pkinase|72|323|8.6e-98	QSK_Mm_CAMK_CAMKL
ENSTRUP00000009566	0	Pkinase|4|286|7.3e-103	CDK5_Mm_CMGC_CDK
ENSTRUP00000009730	0	SH2|377|457|0.00036	Pkinase|519|779|2.1e-09	Pkinase|822|1096|2.7e-39	JAK2_Hs_TK_JakA
ENSTRUP00000009845	1	Activin_recp|27|117|7.2e-18	Pkinase|192|478|2.9e-60	ACTR2B_Mm_TKL_STKR
ENSTRUP00000009878	0	Pkinase|4|230|2.5e-56	Other_Unclassified
ENSTRUP00000009938	0	Pkinase|1|209|1.6e-44	DRAK2_Hs_CAMK_DAPK
ENSTRUP00000010030	1	V-set|7|108|4.3e-08	I-set|8|107|0.00016	ig|22|92|1.6e-10	V-set|113|197|0.0022	ig|128|184|8e-08	I-set|237|325|6.8e-09	V-set|237|326|0.0052	ig|249|310|3.1e-07	I-set|333|434|2.9e-05	V-set|333|435|4e-05	ig|348|419|3.3e-05	Pkinase|551|827|1.1e-43	FGFR3_Mm_TK_FGFR
ENSTRUP00000010048	0	Pkinase|10|334|4.6e-57	HIPK3_Mm_CMGC_DYRK
ENSTRUP00000010269	0	Pkinase|88|300|4.2e-48	Other_Unclassified
ENSTRUP00000010283	1	Recep_L_domain|27|139|2.2e-31	Furin-like|154|310|2.7e-63	Recep_L_domain|338|458|3.4e-31	Pkinase|690|946|7.3e-37	ErbB2_Mm_TK_EGFR
ENSTRUP00000010378	0	Pkinase|18|247|2.3e-85	KA1|613|659|1.3e-15	MELK_Mm_CAMK_CAMKL
ENSTRUP00000010382	0	Pkinase|22|266|9e-67	ZAK_Mm_TKL_MLK
ENSTRUP00000010449	0	Pkinase|81|349|4.2e-49	Wnk4_Mm_Other_WNK
ENSTRUP00000010466	0	PH|5|111|3.8e-11	BTK|117|148|8.1e-16	SH3_1|170|225|1.4e-15	SH3_2|171|225|7.5e-08	SH2|235|321|2.1e-29	Pkinase|361|609|9.2e-44	ITK_Mm_TK_Tec
ENSTRUP00000010568	0	Pkinase|14|273|1.3e-80	PAK6_Hs_STE_STE20
ENSTRUP00000010780	0	Pkinase|1|203|1.2e-55	CaMK1a_Hs_CAMK_CAMK1
ENSTRUP00000010866	0	Pkinase|6|271|4e-74	PKCa_Hs_AGC_PKC
ENSTRUP00000010892	0	Pkinase|45|299|2.5e-92	F47F2.1_Ce_AGC_PKA
ENSTRUP00000011085	0	SH3_1|59|115|1.2e-21	SH3_2|60|115|1.3e-10	SH2|122|204|1.3e-39	Pkinase|240|492|8.2e-45	LCK_Hs_TK_Src
ENSTRUP00000011259	2	V-set|30|122|0.021	ig|45|99|0.11	V-set|207|297|0.0003	ig|220|279|2e-05	I-set|310|396|0.0016	ig|317|381|0.0053	Pkinase|579|901|2.7e-32	PDGFRb_Hs_TK_PDGFR
ENSTRUP00000011300	0	Pkinase|10|337|7.3e-56	HIPK2_Mm_CMGC_DYRK
ENSTRUP00000011376	0	C2|8|99|7e-15	C1_1|171|224|3.8e-22	C1_1|245|297|2.8e-23	Pkinase|417|677|6.4e-85	Pkinase_C|697|743|7e-15	PKCeps_Mm_AGC_PKC
ENSTRUP00000011453	0	Pkinase|115|379|1.8e-30	Gal-bind_lectin|374|472|3.6e-06	KSR1_Mm_TKL_RAF
ENSTRUP00000011523	0	Pkinase|46|312|8.9e-35	gish_Dm_CK1_CK1
ENSTRUP00000011647	0	Pkinase|121|381|1e-59	MAP2K7_Mm_STE_STE7
ENSTRUP00000011667	0	Pkinase|83|367|6.6e-99	GSK3A_Hs_CMGC_GSK
ENSTRUP00000011806	0	Pkinase|52|318|1.8e-34	gish_Dm_CK1_CK1
ENSTRUP00000011819	0	Pkinase|4|259|7e-76	NEK4_Mm_Other_NEK
ENSTRUP00000011910	0	PBD|73|131|9e-31	Pkinase|287|538|2.5e-97	PAK3_Mm_STE_STE20
ENSTRUP00000012249	0	Pkinase|84|319|2.1e-12	Trb1_Hs_CAMK_Trbl
ENSTRUP00000012260	0	Pkinase|78|364|2.7e-94	CaMK1a_Hs_CAMK_CAMK1
ENSTRUP00000012264	0	C1_1|162|214|1.7e-19	C1_3|173|204|0.0036	C1_1|234|286|2.8e-24	C1_3|245|276|0.15	Pkinase|353|607|6.1e-86	Pkinase_C|627|673|7.2e-18	PKCt_Mm_AGC_PKC
ENSTRUP00000012265	0	Pkinase|25|309|6.8e-92	p38b_Mm_CMGC_MAPK
ENSTRUP00000012277	0	Pkinase|21|274|4.4e-108	CaMK1g_Hs_CAMK_CAMK1
ENSTRUP00000012384	0	Pkinase|28|279|8.6e-67	TAO2_Mm_STE_STE20
ENSTRUP00000012392	1	Recep_L_domain|51|167|9e-43	Furin-like|181|336|3.5e-82	Recep_L_domain|351|466|3.4e-41	Pkinase|1000|1265|2.8e-36	IGF1R_Hs_TK_InsR
ENSTRUP00000012443	0	Pkinase|4|285|5e-102	MAK_Mm_CMGC_RCK
ENSTRUP00000012535	0	Pkinase|97|354|4.9e-96	PSKH1_Mm_CAMK_PSK
ENSTRUP00000012778	0	Pkinase|184|414|1.5e-64	BRSK2_Hs_CAMK_CAMKL
ENSTRUP00000012879	0	Pkinase|109|366|2.1e-51	MYT1_Mm_Other_WEE
ENSTRUP00000013031	0	Pkinase|32|305|1.3e-48	NKF1_Sp_Other_NKF1
ENSTRUP00000013187	0	Kdo|33|218|0.0038	Pkinase|37|289|1.8e-83	CDKL1_Mm_CMGC_CDKL
ENSTRUP00000013208	0	Ephrin_lbd|8|190|6e-135	GCC2_GCC3|252|296|0.00042	fn3|318|414|7.3e-18	fn3|429|513|2.7e-24	Pkinase|605|861|1.2e-44	SAM_2|891|958|2.4e-24	SAM_1|892|956|6.2e-31	EphB4_Mm_TK_Eph
ENSTRUP00000013231	0	Pkinase|83|367|1.8e-76	MNK2_Hs_CAMK_MAPKAPK
ENSTRUP00000013368	2	Activin_recp|62|142|1.3e-21	TGF_beta_GS|206|234|2e-13	Pkinase|236|523|3.7e-54	BMPR1B_Mm_TKL_STKR
ENSTRUP00000013402	0	Pkinase|4|258|3.7e-80	RCC1|415|464|0.06	RCC1|467|516|0.012	RCC1|585|632|0.0015	RCC1|635|687|0.008	NEK8_Hs_Other_NEK
ENSTRUP00000013412	1	Pkinase|107|377|4.6e-15	LMR1_Mm_TK_Lmr
ENSTRUP00000013498	0	PB1|18|101|4.3e-18	C1_1|134|186|1.3e-21	Pkinase|247|515|6.4e-90	Pkinase_C|535|581|2e-12	aPKC_Dm_AGC_PKC
ENSTRUP00000013650	0	Pkinase|6|261|8e-90	p70S6Kb_Mm_AGC_RSK
ENSTRUP00000013679	1	ig|25|104|0.59	V-set|234|332|0.00069	ig|248|316|1.6e-07	I-set|335|430|3.8e-05	ig|353|415|1	ig|453|549|2.3	ig|583|666|2	V-set|682|779|0.0019	I-set|689|776|3.5e-16	ig|703|761|1.3e-08	Pkinase|856|1171|7.2e-34	FLT4_Mm_TK_VEGFR
ENSTRUP00000013688	0	HR1|54|131|0.0021	Pkinase|461|720|1.5e-83	Pkinase_C|740|787|2.8e-08	PKN2_Mm_AGC_PKN
ENSTRUP00000013710	0	Pkinase|3|257|2e-94	PKACb_Hs_AGC_PKA
ENSTRUP00000013808	0	Pkinase|3|291|1.7e-80	ERK2_Mm_CMGC_MAPK
ENSTRUP00000013966	1	Pkinase|259|605|4.9e-40	FLT3_Hs_TK_PDGFR
ENSTRUP00000014077	0	RGS|52|170|1e-30	Pkinase|186|448|9.6e-80	GPRK6_Hs_AGC_GRK
ENSTRUP00000014239	1	Ephrin_lbd|1|178|1.5e-134	GCC2_GCC3|240|284|0.0058	fn3|306|402|1.1e-16	fn3|417|501|1e-25	Pkinase|604|863|1.1e-44	SAM_2|893|960|1.2e-26	SAM_1|894|958|4.4e-32	EphB4_Mm_TK_Eph
ENSTRUP00000014478	0	Pkinase|35|294|8.1e-94	Pkinase_C|316|360|3.3e-10	Pkinase|386|643|3.5e-108	RSK3_Mm_AGC_RSK
ENSTRUP00000014545	0	Pkinase|1|215|3.2e-12	SRC_Mm_TK_Src
ENSTRUP00000014596	0	Pkinase|64|308|2.4e-28	Trb2_Mm_CAMK_Trbl
ENSTRUP00000014704	0	SH2|11|88|2.3e-25	SH2|164|240|1.6e-32	Pkinase|328|583|7.2e-33	ZAP70_Mm_TK_Syk
ENSTRUP00000014748	0	SH3_1|72|127|4.2e-19	SH3_2|73|127|1.5e-08	SH2|135|210|9e-36	Pkinase|250|501|3.4e-50	F_actin_bind|989|1176|1.5e-64	ARG_Mm_TK_Abl
ENSTRUP00000014758	0	Pkinase|4|289|1.3e-87	PITSLRE_Mm_CMGC_CDK
ENSTRUP00000015002	0	Pkinase|97|390|5e-89	PCTAIRE3_Mm_CMGC_CDK
ENSTRUP00000015026	0	RGS|46|165|4.3e-07	Pkinase|181|441|1.2e-64	GPRK5_Hs_AGC_GRK
ENSTRUP00000015053	1	ig|43|104|1.5	V-set|222|319|0.0022	ig|236|303|0.00012	I-set|322|412|0.00072	V-set|547|642|0.0038	ig|559|624|0.00029	I-set|647|733|6.2e-16	ig|661|718|2.2e-10	Pkinase|811|1128|1.2e-32	VEGFR2_Sp_TK_VEGFR
ENSTRUP00000015108	0	Pkinase|66|320|7.5e-95	PKACb_Hs_AGC_PKA
ENSTRUP00000015273	1	Activin_recp|12|116|9.6e-08	Pkinase|190|490|1e-38	APH|192|394|0.0068	BMPR2_Mm_TKL_STKR
ENSTRUP00000015384	0	C1_1|108|160|7e-15	C1_3|119|150|0.0065	C1_1|226|278|4.1e-17	C1_3|237|268|0.051	PH|376|475|7.9e-05	Pkinase|511|767|3.2e-78	PKD3_Hs_CAMK_PKD
ENSTRUP00000015427	0	Pkinase|107|391|2.3e-101	GSK3A_Hs_CMGC_GSK
ENSTRUP00000015442	0	Pkinase|600|852|2.4e-77	MAP3K5_Mm_STE_STE11
ENSTRUP00000015471	0	Pkinase|9|273|2.3e-76	ULK2_Mm_Other_ULK
ENSTRUP00000015698	0	Pkinase|76|408|1.2e-84	UBA|428|464|6.6e-05	KA1|777|825|1.4e-15	Other_Unclassified
ENSTRUP00000015706	1	Ephrin_lbd|39|212|6.1e-132	fn3|336|429|1.3e-13	fn3|442|527|2.7e-18	Pkinase|624|881|6.9e-38	SAM_2|913|980|1e-21	SAM_1|914|978|3.9e-25	EphB4_Mm_TK_Eph
ENSTRUP00000015809	0	Pkinase|13|275|1.4e-89	DAPK3_Mm_CAMK_DAPK
ENSTRUP00000015829	0	SH3_1|2|57|6.1e-19	SH3_2|3|57|2e-07	SH2|65|147|1.8e-38	Pkinase|183|431|9.4e-45	LCK_Hs_TK_Src
ENSTRUP00000015841	0	Pkinase|1|176|2e-08	EphA7_Hs_TK_Eph
ENSTRUP00000015952	0	Pkinase|5|179|1.7e-30	FRAY_Sp_STE_STE20
ENSTRUP00000016088	2	V-set|28|129|0.0073	ig|133|191|1.7	V-set|215|311|0.045	ig|229|294|0.054	ig|419|497|4	Pkinase|584|914|1.5e-36	FMS_Hs_TK_PDGFR
ENSTRUP00000016097	0	Pkinase|310|558|5.2e-47	Wnk4_Mm_Other_WNK
ENSTRUP00000016238	0	Pkinase|55|344|5.4e-84	NLK_Hs_CMGC_MAPK
ENSTRUP00000016249	0	RBD|54|153|4e-24	C1_1|161|209|1.9e-18	Pkinase|363|620|9.1e-80	RAF1_Hs_TKL_RAF
ENSTRUP00000016483	0	Pkinase|127|393|3e-11	Other_Unclassified
ENSTRUP00000016494	0	Pkinase|90|371|2.2e-81	CAMKK1_Mm_Other_CAMKK
ENSTRUP00000016634	0	Pkinase|176|489|2.6e-71	DYRK2_Hs_CMGC_DYRK
ENSTRUP00000016786	0	Pkinase|28|308|6.9e-30	SBK_Mm_Other_NKF1
ENSTRUP00000016857	0	Pkinase|158|477|2.7e-61	DYRK1A_Hs_CMGC_DYRK
ENSTRUP00000016968	0	Pkinase|65|316|1.1e-104	MARK1_Hs_CAMK_CAMKL
ENSTRUP00000017213	1	Activin_recp|11|85|8.4e-09	TGF_beta_GS|152|180|4e-15	Pkinase|182|469|4.1e-72	ALK2_Hs_TKL_STKR
ENSTRUP00000017264	0	Pkinase|383|637|3.8e-82	caMLCK_Hs_CAMK_MLCK
ENSTRUP00000017422	1	Ephrin_lbd|8|181|6.2e-128	GCC2_GCC3|246|289|0.0045	fn3|309|405|6.7e-14	fn3|420|504|4.5e-23	Pkinase|601|860|6.1e-46	SAM_2|892|959|1.7e-25	SAM_1|893|957|8.4e-32	EphB4_Mm_TK_Eph
ENSTRUP00000017533	0	Activin_recp|2|76|1.1e-11	TGF_beta_GS|143|171|2e-13	Pkinase|173|460|1e-58	ALK7_Mm_TKL_STKR
ENSTRUP00000017735	0	Ephrin_lbd|1|172|5.4e-121	GCC2_GCC3|234|278|0.00016	fn3|300|394|7.5e-14	fn3|411|497|0.0011	Pkinase|603|862|4.4e-41	EphB4_Mm_TK_Eph
ENSTRUP00000017958	0	Pkinase|77|343|1.6e-64	Pkinase_C|361|408|1.2e-13	M|457|477|48	M|606|626|1.1e+02	M|717|737|23	M|778|798|5.2	M|799|819|13	DMPK_coil|885|945|4.2e-34	M|923|943|38	C1_1|1022|1074|3.1e-16	PH|1092|1211|1.7e-08	CNH|1238|1464|3.9e-44	MRCKa_Hs_AGC_DMPK
ENSTRUP00000017962	0	Pkinase|19|277|1.1e-34	PIM1_Mm_CAMK_PIM
ENSTRUP00000017963	0	Pkinase|30|276|3.1e-10	PIM1_Mm_CAMK_PIM
ENSTRUP00000018118	0	Pkinase|78|344|2.7e-13	FES_Mm_TK_Fer
ENSTRUP00000018202	0	FERM_M|135|261|0.0001	Pkinase|429|683|2.4e-40	Focal_AT|904|1035|1.4e-86	FAK_Mm_TK_FAK
ENSTRUP00000018304	0	Pkinase|447|725|4.5e-60	TLK1_Hs_Other_TLK
ENSTRUP00000018428	1	Ephrin_lbd|1|174|1.3e-126	GCC2_GCC3|235|279|0.0048	fn3|299|394|8.4e-12	fn3|410|494|3.1e-17	Pkinase|590|855|1.9e-47	SAM_2|889|954|1.9e-10	SAM_1|890|950|1.4e-11	EphB4_Mm_TK_Eph
ENSTRUP00000018523	0	Pkinase|13|271|2.7e-100	CaMKII_AD|498|625|3.3e-90	CaMK2g_Hs_CAMK_CAMK2
ENSTRUP00000018586	0	Pkinase|1|250|4.7e-84	PLK4_Mm_Other_PLK
ENSTRUP00000018653	1	ig|45|110|0.61	ig|233|295|0.1	I-set|319|413|2.7e-09	ig|333|396|1.4	Pkinase|596|953|8.6e-40	PDGFRb_Hs_TK_PDGFR
ENSTRUP00000018740	0	Pkinase|14|265|1.7e-28	HIPK3_Mm_CMGC_DYRK
ENSTRUP00000018791	1	ecTbetaR2|3|114|8.4e-67	Pkinase|190|485|6.1e-47	TGFBR2_Mm_TKL_STKR
ENSTRUP00000018820	0	DCX|69|133|1.4e-19	DCX|198|259|1.8e-23	Pkinase|385|642|8.3e-103	DCAMKL1_Mm_CAMK_DCAMKL
ENSTRUP00000018835	1	Recep_L_domain|19|131|3.9e-47	Furin-like|145|310|1.8e-81	Recep_L_domain|326|441|6.9e-48	fn3|590|674|0.089	fn3|806|893|6.2e-05	Pkinase|973|1240|1.2e-32	INSR_Mm_TK_InsR
ENSTRUP00000018851	0	Pkinase|39|304|5.8e-73	CaMKII_AD|447|574|1.8e-85	CaMK2g_Hs_CAMK_CAMK2
ENSTRUP00000019286	0	Pkinase|52|332|6.1e-74	HUNK_Mm_CAMK_CAMKL
ENSTRUP00000019476	0	Pkinase|61|315|0.0012	Other_Unclassified
ENSTRUP00000019607	0	Pkinase|121|379|1.7e-32	SH3_1|385|440|0.0012	GTPase_binding|441|508|2.7e-33	ACK_Mm_TK_Ack
ENSTRUP00000019630	0	Pkinase|28|335|7.7e-22	SBK_Mm_Other_NKF1
ENSTRUP00000019840	0	DUF1908|60|335|1.2e-133	Pkinase|378|651|3.8e-81	PDZ|937|1023|4e-05	MAST3_Mm_AGC_MAST
ENSTRUP00000020095	0	Pkinase|15|265|8.9e-92	MST3_Mm_STE_STE20
ENSTRUP00000020213	0	Pkinase|1|213|6.6e-32	Trad_Hs_CAMK_Trio
ENSTRUP00000020227	0	Pkinase|24|367|3.7e-11	PINK1_Mm_Other_NKF2
ENSTRUP00000020248	1	Ephrin_lbd|1|195|4.6e-74	GCC2_GCC3|258|304|0.002	fn3|324|423|0.002	fn3|441|525|1.6e-14	Pkinase|623|883|5e-37	SAM_2|910|977|6.7e-19	SAM_1|911|975|1.1e-20	EphB4_Mm_TK_Eph
ENSTRUP00000020469	0	Pkinase|81|649|2.1e-42	SRPK1_Mm_CMGC_SRPK
ENSTRUP00000020504	0	Pkinase|45|294|1.7e-41	TESK1_Mm_TKL_LISK
ENSTRUP00000020585	0	C1_1|124|176|3.1e-17	C1_3|135|166|0.0076	C1_1|241|293|2.4e-17	C1_3|252|283|0.035	PH|387|502|9.4e-11	Pkinase|546|802|1.3e-78	PKD3_Hs_CAMK_PKD
ENSTRUP00000020607	0	Pkinase|66|325|9.2e-95	Pkinase_C|345|389|2.7e-10	Pkinase|419|676|1.6e-100	RSK1_Mm_AGC_RSK
ENSTRUP00000020834	0	Pkinase|693|1009|1.1e-44	Other_Unclassified
ENSTRUP00000020840	0	Kdo|217|384|0.095	Pkinase|222|550|5.2e-60	HIPK2_Mm_CMGC_DYRK
ENSTRUP00000020850	0	Pkinase|28|281|1.6e-71	TAO2_Mm_STE_STE20
ENSTRUP00000020954	0	Pkinase|4|324|3.8e-11	Other_Unclassified
ENSTRUP00000020996	0	Pkinase|65|326|6.7e-91	Pkinase_C|346|391|2.6e-12	p70S6Kb_Mm_AGC_RSK
ENSTRUP00000021054	0	Pkinase|2|205|4.3e-11	PYK2_Mm_TK_FAK
ENSTRUP00000021114	0	DUF1908|61|337|4.7e-122	Pkinase|357|630|4.1e-82	PDZ|835|920|0.001	MAST3_Mm_AGC_MAST
ENSTRUP00000021143	2	Ephrin_lbd|32|206|1.5e-139	GCC2_GCC3|268|309|0.0054	fn3|331|424|6.2e-14	fn3|442|526|4e-21	Pkinase|622|879|8.2e-44	SAM_2|911|978|1e-21	SAM_1|912|976|1.6e-22	EphB4_Mm_TK_Eph
ENSTRUP00000021497	0	Pkinase|73|338|9.6e-56	Pkinase_C|356|403|1.9e-08	MRCKa_Hs_AGC_DMPK
ENSTRUP00000021548	0	Pkinase|25|310|1.1e-82	P38c_Dm_CMGC_MAPK
ENSTRUP00000021556	0	Pkinase|96|354|4.7e-77	Pkinase_C|374|419|3.5e-09	SGK3_Mm_AGC_SGK
ENSTRUP00000021639	0	Pkinase|23|310|1.2e-84	p38a_Mm_CMGC_MAPK
ENSTRUP00000021654	0	PH|6|108|7.3e-21	Pkinase|151|408|5.2e-111	Pkinase_C|428|478|3.1e-13	AKT2_Mm_AGC_Akt
ENSTRUP00000021741	0	Pkinase|34|287|7e-78	SLK_Mm_STE_STE20
ENSTRUP00000021907	0	Pkinase|25|309|8.8e-86	p38a_Mm_CMGC_MAPK
ENSTRUP00000021951	0	Pkinase|23|307|4.5e-78	p38b_Mm_CMGC_MAPK
ENSTRUP00000021966	0	Pkinase|11|245|4.6e-05	HEAT|335|371|1.5	HEAT|374|410|0.021	SCYL3_Mm_Other_SCY1
ENSTRUP00000022132	0	Pkinase|1|246|6.6e-25	Other_Unclassified
ENSTRUP00000022439	0	Pkinase|20|241|3.3e-41	Other_Unclassified
ENSTRUP00000022496	0	SH2|379|457|3.9e-06	Pkinase|520|777|5.5e-11	Pkinase|818|1092|3.2e-33	JAK3_Mm_TK_JakA
ENSTRUP00000022568	0	Pkinase|19|315|2.1e-93	CDK9_Mm_CMGC_CDK
ENSTRUP00000022790	0	PX|5|114|5.8e-28	Kdo|152|341|0.087	Pkinase|152|409|2e-91	Pkinase_C|429|481|1.5e-11	SGK3_Mm_AGC_SGK
ENSTRUP00000022822	0	Pkinase|15|308|2e-49	IKKb_Mm_Other_IKK
ENSTRUP00000022890	0	Pkinase|161|400|2.3e-71	LZK_Sp_TKL_MLK
ENSTRUP00000022929	0	FCH|1|94|4.9e-18	SH2|467|538|1.4e-33	Pkinase|570|822|3.4e-47	Fer_Sp_TK_Fer
ENSTRUP00000022933	0	Pkinase|798|1067|1.1e-40	JAK1_Hs_TK_JakA
ENSTRUP00000022992	0	Pkinase|183|499|1.8e-69	CLK2_Mm_CMGC_CLK
ENSTRUP00000023053	0	Pkinase|16|273|1.5e-72	CNH|549|862|3.8e-104	KHS1_Mm_STE_STE20
ENSTRUP00000023197	0	Pkinase|139|420|7.4e-88	PCTAIRE1_Mm_CMGC_CDK
ENSTRUP00000023291	0	Pkinase|28|278|7e-105	NuaK2_Mm_CAMK_CAMKL
ENSTRUP00000023342	0	Pkinase|14|305|1.5e-101	ERK7_Mm_CMGC_MAPK
ENSTRUP00000023371	0	Pkinase|6|263|1.1e-92	Pkinase_C|283|330|6.5e-06	SGK2_Mm_AGC_SGK
ENSTRUP00000023514	0	Pkinase|645|902|8.2e-38	SgK496_Hs_Other_SgK496
ENSTRUP00000023551	0	Pkinase|1|202|1.6e-26	Other_Unclassified
ENSTRUP00000023647	0	Pkinase|17|291|1.2e-67	OSR1_Mm_STE_STE20
ENSTRUP00000023869	0	Pkinase|5|350|1e-44	CLIK1L_Hs_Other_NKF4
ENSTRUP00000023870	0	Pkinase|4|288|2.5e-81	CCRK_Mm_CMGC_CDK
ENSTRUP00000023999	0	Pkinase|68|393|1.1e-45	CLIK1_Hs_Other_NKF4
ENSTRUP00000024077	0	C1_1|34|86|9.4e-22	C1_1|99|151|1.6e-23	C1_3|110|141|0.015	C2|170|257|2.2e-38	Pkinase|339|597|9.1e-80	Pkinase_C|617|662|1.7e-15	PKCa_Hs_AGC_PKC
ENSTRUP00000024107	0	Pkinase|4|287|7.1e-114	CDKL1_Mm_CMGC_CDKL
ENSTRUP00000024301	1	LRRNT|28|56|0.023	LRR_1|87|109|33	LRR_1|111|133|0.32	LRR_1|134|156|72	C2-set_2|190|269|0.0076	I-set|190|275|4.5e-06	Pkinase|512|792|3.4e-46	TRKB_Mm_TK_Trk
ENSTRUP00000024307	0	Pkinase|1|219|3.8e-43	DRAK2_Hs_CAMK_DAPK
ENSTRUP00000024631	0	Pkinase|29|284|7.3e-42	SYK_Mm_TK_Syk
ENSTRUP00000024739	0	Pkinase|206|487|4.7e-92	PCTAIRE2_Mm_CMGC_CDK
ENSTRUP00000024782	2	Pkinase|28|374|3.8e-97	YrbL-PhoP_reg|29|185|0.0042	Other_Unclassified
ENSTRUP00000024797	0	Pkinase|21|280|1.6e-24	TTBK2_Mm_CK1_TTBK
ENSTRUP00000024843	0	Pkinase|47|316|6.4e-53	MAP3K3_Hs_STE_STE11
ENSTRUP00000025167	1	V-set|1|95|0.0064	I-set|2|94|0.0017	ig|16|78|0.003	ig|112|164|0.033	fn3|184|269|1.5e-07	Pkinase|470|738|3.7e-39	TYRO3_Mm_TK_Axl
ENSTRUP00000025241	1	Sema|52|484|8.5e-53	PSI|509|551|1.3e-11	TIG|552|643|1e-18	TIG|657|744|9.9e-24	TIG|748|842|8.5e-16	Pkinase|1065|1324|5e-40	MET_Mm_TK_Met
ENSTRUP00000025250	0	Pkinase|9|273|4.9e-44	C03C10.1_Ce_CK1_CK1
ENSTRUP00000025339	0	Pkinase|15|215|4e-68	SIK_Mm_CAMK_CAMKL
ENSTRUP00000025369	1	Pkinase|102|371|3.1e-11	LMR1_Mm_TK_Lmr
ENSTRUP00000025528	0	Spectrin|8|105|0.025	Spectrin|334|439|0.00037	Spectrin|565|671|8.5e-09	RhoGEF|723|893|9.4e-31	PH|907|1018|1e-13	SH3_1|1085|1147|4.7e-08	SH3_2|1086|1147|0.023	RhoGEF|1399|1570|4.3e-39	PH|1584|1697|4.6e-05	SH3_2|1967|2026|0.26	I-set|2095|2186|2e-21	V-set|2096|2187|0.00086	ig|2109|2171|5.6e-08	Pkinase|2205|2463|3.4e-60	Trio_Hs_CAMK_Trio
ENSTRUP00000025732	0	Pkinase|627|890|1e-72	MAP3K5_Mm_STE_STE11
ENSTRUP00000025779	0	Pkinase|12|261|2.8e-71	CDK7_Mm_CMGC_CDK
ENSTRUP00000025950	0	DUF1908|61|336|5.3e-111	Pkinase|375|648|6.6e-79	Pkinase_C|666|712|0.0041	PDZ|920|1005|0.0004	MAST3_Mm_AGC_MAST
ENSTRUP00000026225	0	Pkinase|18|206|6.1e-35	MAP3K3_Hs_STE_STE11
ENSTRUP00000026324	0	Pkinase|62|323|1e-74	MAPKAPK2_Mm_CAMK_MAPKAPK
ENSTRUP00000026444	0	V-set|2|96|0.00029	ig|17|81|0.11	V-set|192|292|0.00045	ig|207|275|0.35	ig|529|591|0.061	V-set|612|700|0.02	I-set|613|699|2.6e-18	ig|627|684|2e-08	Pkinase|777|1103|5.9e-36	FLT4_Mm_TK_VEGFR
ENSTRUP00000026495	0	Pkinase|24|284|2.3e-65	CaMK1b_Hs_CAMK_CAMK1
ENSTRUP00000026535	0	Pkinase|2|239|5.2e-84	BRSK2_Hs_CAMK_CAMKL
ENSTRUP00000026597	0	Pkinase|24|309|5.4e-33	HIPK3_Mm_CMGC_DYRK
ENSTRUP00000026604	0	PH|6|108|4.6e-22	Pkinase|152|409|1.1e-109	Pkinase_C|429|479|9e-12	AKT2_Mm_AGC_Akt
ENSTRUP00000026640	0	cNMP_binding|118|203|1.8e-20	cNMP_binding|236|327|1.3e-22	Pkinase|357|616|2.9e-95	PKG1_Hs_AGC_PKG
ENSTRUP00000026750	0	Pkinase|44|298|1.2e-94	PKACb_Hs_AGC_PKA
ENSTRUP00000026781	0	Pkinase|1|156|1.4e-09	Other_Unclassified
ENSTRUP00000026881	0	Pkinase|6|260|6.3e-90	Pkinase_C|280|326|9.5e-15	PKCt_Mm_AGC_PKC
ENSTRUP00000027030	0	LIM|35|92|4.9e-12	PDZ|112|195|7.8e-07	Pkinase|290|565|4.4e-41	LIMK_Sp_TKL_LISK
ENSTRUP00000027074	0	Pkinase|26|285|6.1e-97	Pkinase_C|305|349|2.5e-11	Pkinase|382|639|3.8e-106	RSK3_Mm_AGC_RSK
ENSTRUP00000027156	0	Pkinase|23|315|5.1e-95	ERK5_Mm_CMGC_MAPK
ENSTRUP00000027182	0	Pkinase|6|207|9.8e-39	ROCK2_Mm_AGC_DMPK
ENSTRUP00000027183	0	Pkinase|3|300|2.4e-61	Pkinase_C|320|361|1.4e-06	ROCK2_Mm_AGC_DMPK
ENSTRUP00000027188	0	Pkinase|199|527|9e-59	HIPK2_Mm_CMGC_DYRK
ENSTRUP00000027235	1	F5_F8_type_C|41|190|3.4e-28	Pkinase|576|870|1.1e-33	DDR1_Mm_TK_DDR
ENSTRUP00000027431	0	SH3_1|90|149|2.3e-16	SH3_2|91|149|1.9e-08	Pkinase|179|438|2e-83	MLK2_Mm_TKL_MLK
ENSTRUP00000027659	0	SH3_1|12|69|0.016	SH3_2|13|69|0.00019	SH2|83|157|1.9e-25	Pkinase|196|439|7e-38	CTK_Mm_TK_Csk
ENSTRUP00000027698	0	Pkinase|36|328|5.2e-35	Other_Unclassified
ENSTRUP00000027958	0	Pkinase|9|273|2.5e-47	C03C10.1_Ce_CK1_CK1
ENSTRUP00000028027	0	Pkinase|8|746|3.5e-44	Other_Unclassified
ENSTRUP00000028066	0	Pkinase|112|371|8.1e-37	ACK_Mm_TK_Ack
ENSTRUP00000028095	0	Pkinase|56|341|1.2e-81	PFTAIRE2_Mm_CMGC_CDK
ENSTRUP00000028192	0	Pkinase|2|207|2.6e-15	FAK_Mm_TK_FAK
ENSTRUP00000028193	0	Pkinase|7|264|3.4e-68	NEK1_Mm_Other_NEK
ENSTRUP00000028362	0	Pkinase|154|393|3e-72	LZK_Sp_TKL_MLK
ENSTRUP00000028505	0	PQQ|36|73|0.16	PQQ|119|156|12	PQQ|199|237|0.1	Pkinase|542|802|1.7e-38	Ribonuc_2-5A|807|933|1.3e-67	IRE1_Mm_Other_IRE
ENSTRUP00000028550	1	Pkinase|62|313|6e-78	NIM1_Mm_CAMK_CAMKL
ENSTRUP00000028812	0	C2|8|99|2.9e-12	C1_1|173|226|3.2e-21	C1_1|245|297|1.3e-22	Pkinase|352|612|4.7e-81	Pkinase_C|632|678|4.2e-17	PKCeps_Mm_AGC_PKC
ENSTRUP00000028874	0	Pkinase|34|319|3.5e-80	Pkinase_C|339|382|4.9e-11	Pkinase|427|688|4.7e-84	MSK1_Hs_AGC_RSK
ENSTRUP00000028962	0	Pkinase|6|263|1.1e-89	Pkinase_C|283|333|1.8e-07	SGK1_Mm_AGC_SGK
ENSTRUP00000028989	0	Pkinase|341|596|5.2e-87	caMLCK_Hs_CAMK_MLCK
ENSTRUP00000029054	0	Pkinase|112|363|7.8e-108	UBA|383|419|0.0028	MARK1_Hs_CAMK_CAMKL
ENSTRUP00000029122	0	C1_1|419|466|0.00064	Pkinase|701|965|1.6e-31	KSR1_Mm_TKL_RAF
ENSTRUP00000029377	0	RBD|165|237|1.9e-37	C1_1|245|293|4.5e-17	C1_3|256|283|0.0044	Pkinase|468|725|4.8e-82	RAF1_Hs_TKL_RAF
ENSTRUP00000029482	0	SH3_1|5|64|1.3e-12	SH3_2|6|63|9.4e-08	Pkinase|94|353|2.7e-85	MLK1_Mm_TKL_MLK
ENSTRUP00000029567	1	Ephrin_lbd|29|194|7.7e-76	GCC2_GCC3|251|293|0.0016	fn3|315|408|2.3e-12	fn3|425|515|9e-07	Pkinase|614|871|5.8e-48	SAM_2|901|968|2.2e-13	SAM_1|902|966|1.1e-24	EphB4_Mm_TK_Eph
ENSTRUP00000029779	0	Pkinase|16|292|5.5e-38	Death|565|638|2e-07	RIPK1_Mm_TKL_RIPK
ENSTRUP00000029854	0	Pkinase|9|271|5.2e-83	ULK1_Mm_Other_ULK
ENSTRUP00000029913	1	Recep_L_domain|28|139|4.6e-25	Furin-like|155|309|1.5e-80	Recep_L_domain|332|451|1.7e-37	Pkinase|683|946|1.2e-35	EGFR_Mm_TK_EGFR
ENSTRUP00000030203	0	C1_1|166|218|3e-21	C1_3|177|208|0.0037	C1_1|238|290|4.8e-25	C1_3|249|280|0.084	Pkinase|363|617|1.4e-84	Pkinase_C|637|683|2.3e-13	PKCt_Mm_AGC_PKC
ENSTRUP00000030254	0	Pkinase|28|222|3.3e-43	NDR1_Hs_AGC_NDR
ENSTRUP00000030468	0	Pkinase|133|440|5.2e-83	APH|135|338|0.0041	CK2a2_Mm_CMGC_CK2
ENSTRUP00000030627	0	Pkinase|214|453|6.9e-75	LZK_Sp_TKL_MLK
ENSTRUP00000030676	0	LRR_1|802|823|5.8	LRR_1|825|847|52	LRR_1|849|870|44	LRR_1|874|895|0.08	LRR_1|897|919|30	Miro|964|1081|1.4e-23	Ras|964|1136|0.00086	Pkinase|1503|1760|1e-37	LRRK2_Hs_TKL_LRRK
ENSTRUP00000030700	0	Pkinase|74|409|6e-51	CLIK1_Hs_Other_NKF4
ENSTRUP00000030732	0	PH|4|112|2.6e-13	BTK|119|150|2.1e-17	SH3_1|193|248|1.8e-19	SH3_2|194|248|1.4e-06	SH2|257|338|1.7e-31	Pkinase|377|627|3e-48	BTK_Mm_TK_Tec
ENSTRUP00000030973	1	F5_F8_type_C|41|173|1.4e-30	Pkinase|592|880|5.4e-36	DDR2_Hs_TK_DDR
ENSTRUP00000030991	0	Pkinase|26|305|6.6e-09	HEAT|417|453|4.7e-05	HEAT|462|498|0.0015	HEAT|576|613|2.6	HEAT|619|651|4.2	HEAT|656|691|16	WD40|989|1027|1.3e-08	WD40|1038|1076|8.9	WD40|1235|1275|0.018	WD40|1329|1368|0.0004	PIK3R4_Mm_Other_VPS15
ENSTRUP00000030994	1	V-set|72|183|0.0032	I-set|81|168|0.0056	ig|95|166|0.00011	ig|200|252|1.1	fn3|272|355|8.4e-09	Pkinase|676|943|1.8e-40	MER_Mm_TK_Axl
ENSTRUP00000031086	0	Pkinase|25|289|5.9e-85	CNH|982|1273|5.6e-101	TNIK_Hs_STE_STE20
ENSTRUP00000031095	0	Pkinase|25|289|3.9e-82	HGK_Hs_STE_STE20
ENSTRUP00000031110	1	Recep_L_domain|19|131|6.4e-42	Furin-like|145|313|1.5e-88	Recep_L_domain|329|443|1.2e-44	fn3|592|674|0.019	fn3|812|898|0.013	Pkinase|976|1244|9.2e-33	IGF1R_Mm_TK_InsR
ENSTRUP00000031287	1	I-set|4|94|4.6e-17	V-set|6|95|0.0002	ig|18|79|1.2e-10	Fz|108|241|1.5e-29	Kringle|256|333|1.1e-31	Pkinase|429|695|4.1e-12	ROR2_Mm_TK_Ror
ENSTRUP00000031327	0	Pkinase|1|157|6.4e-29	Other_Unclassified
ENSTRUP00000031605	1	Activin_recp|6|85|5.4e-22	TGF_beta_GS|154|182|2.2e-12	Pkinase|184|471|3.5e-54	ALK4_Hs_TKL_STKR
ENSTRUP00000031638	1	Activin_recp|34|111|9.5e-24	TGF_beta_GS|178|206|1.6e-14	Pkinase|208|495|3.4e-53	ALK4_Hs_TKL_STKR
ENSTRUP00000031857	0	Spectrin|159|293|0.00035	Spectrin|295|401|0.0002	Spectrin|521|625|0.00098	Spectrin|626|739|0.012	Spectrin|862|967|3.5e-06	Spectrin|1093|1199|2.2e-08	RhoGEF|1251|1421|7.3e-32	PH|1435|1546|2.7e-14	SH3_1|1614|1674|2.7e-05	RhoGEF|1931|2102|1.4e-42	PH|2116|2229|0.0078	I-set|2636|2727|1.1e-25	V-set|2636|2728|0.0025	ig|2650|2712|9.7e-08	Pkinase|2747|3001|1.5e-67	Trio_Hs_CAMK_Trio
ENSTRUP00000031949	0	Pkinase|13|297|9e-91	CDKL5_Hs_CMGC_CDKL
ENSTRUP00000032043	0	cNMP_binding|148|233|3e-23	cNMP_binding|266|356|3.4e-17	Pkinase|373|635|3.8e-81	PKG2_Mm_AGC_PKG
ENSTRUP00000032221	0	Pkinase|44|298|2.3e-93	PKACb_Hs_AGC_PKA
ENSTRUP00000032737	0	C1_1|112|164|9.6e-17	C1_3|123|154|0.0072	C1_1|234|286|9.4e-18	C1_3|245|276|0.02	PH|366|497|7.4e-06	Pkinase|537|795|5.1e-74	PKD2_Mm_CAMK_PKD
ENSTRUP00000032743	0	PBD|11|67|2e-14	Pkinase|415|666|2e-85	PAK6_Mm_STE_STE20
ENSTRUP00000032758	2	I-set|192|273|0.0012	Pkinase|499|783|2.4e-41	TRKA_Mm_TK_Trk
ENSTRUP00000032788	0	Pkinase|26|321|9.5e-78	JNK3_Hs_CMGC_MAPK
ENSTRUP00000032908	0	Pkinase|19|311|5.9e-86	ERK4_Mm_CMGC_MAPK
ENSTRUP00000032946	0	Pkinase|68|320|1.2e-73	NIM1_Mm_CAMK_CAMKL
ENSTRUP00000032963	0	Pkinase|13|275|4.9e-92	DAPK2_Mm_CAMK_DAPK
ENSTRUP00000032982	0	Pkinase|62|343|2.5e-83	MOK_Mm_CMGC_RCK
ENSTRUP00000032983	0	Pkinase|1|292|1.4e-16	HIPK3_Mm_CMGC_DYRK
ENSTRUP00000033031	0	Pkinase|1|207|8.8e-49	smMLCK_Hs_CAMK_MLCK
ENSTRUP00000033127	0	Pkinase|26|321|4.5e-77	JNK3_Hs_CMGC_MAPK
ENSTRUP00000033223	0	Ephrin_lbd|1|155|5.9e-111	NCD3G|207|252|0.0036	GCC2_GCC3|217|260|0.00029	fn3|282|375|1.4e-10	fn3|393|477|0.0075	Pkinase|574|833|3.5e-47	SAM_2|867|934|1.1e-26	SAM_1|868|932|7e-29	EphB4_Mm_TK_Eph
ENSTRUP00000033301	0	Pkinase|16|273|1e-76	CNH|581|893|2.4e-89	KHS2_Hs_STE_STE20
ENSTRUP00000033526	0	RGS|58|175|7.3e-27	Pkinase|191|458|2.3e-71	RHOK_Hs_AGC_GRK
ENSTRUP00000033550	1	ecTbetaR2|11|129|5.5e-53	Pkinase|211|503|1e-46	TGFBR2_Mm_TKL_STKR
ENSTRUP00000033668	0	Pkinase|54|306|7.9e-90	POLO_box|482|545|1.9e-25	POLO_box|578|649|3.4e-22	PLK2_Hs_Other_PLK
ENSTRUP00000033807	0	Pkinase|6|204|3.8e-34	ROCK2_Mm_AGC_DMPK
ENSTRUP00000033876	0	Pkinase|138|390|3.7e-87	AurC_Mm_Other_AUR
ENSTRUP00000033911	0	Pkinase|620|913|8.6e-97	CRK7_Mm_CMGC_CDK
ENSTRUP00000033912	0	Pkinase|16|269|6.2e-92	SNRK_Mm_CAMK_CAMKL
ENSTRUP00000033922	0	Pkinase|12|277|7.4e-29	PIM2_Mm_CAMK_PIM
ENSTRUP00000033954	0	Pkinase|16|269|1.8e-90	SNRK_Mm_CAMK_CAMKL
ENSTRUP00000034014	0	Pkinase|280|537|9.7e-91	DCAMKL2_Mm_CAMK_DCAMKL
ENSTRUP00000034318	0	Pkinase|68|537|6.9e-41	Other_Unclassified
ENSTRUP00000034366	0	PH|1|117|1.4e-08	Pkinase|152|416|2.2e-109	Pkinase_C|436|486|2.5e-12	AKT1_Mm_AGC_Akt
ENSTRUP00000034581	0	Pkinase|2|227|1.4e-44	Wnk3_Mm_Other_WNK
ENSTRUP00000034664	0	Pkinase|391|670|7.8e-62	TLK2_Hs_Other_TLK
ENSTRUP00000034736	0	Pkinase|32|327|2.1e-09	SCYL2_Mm_Other_SCY1
ENSTRUP00000034910	0	Pkinase|1|201|2.7e-59	BRSK1_Hs_CAMK_CAMKL
ENSTRUP00000035075	0	LIM|12|67|1.3e-19	LIM|71|127|3.6e-12	PDZ|151|234|3.4e-10	Pkinase|335|605|2.2e-50	LIMK2_Mm_TKL_LISK
ENSTRUP00000035149	2	Activin_recp|64|144|2.4e-20	TGF_beta_GS|208|238|1e-11	Pkinase|240|527|7e-57	BMPR1B_Mm_TKL_STKR
ENSTRUP00000035154	0	Pkinase|1|254|3.5e-17	TTBK2_Mm_CK1_TTBK
ENSTRUP00000035313	0	HR1|27|99|4.8e-16	HR1|116|194|9.9e-15	HR1|201|278|1.4e-15	Pkinase|593|852|4.7e-81	Pkinase_C|872|919|2.6e-10	PKN2_Mm_AGC_PKN
ENSTRUP00000035729	2	Sema|51|487|1.8e-69	PSI|512|554|4.5e-09	TIG|555|646|5.4e-18	TIG|660|747|7e-18	TIG|751|842|4.9e-16	Pkinase|1064|1323|7.2e-32	MET_Mm_TK_Met
ENSTRUP00000036005	0	Pkinase|18|271|7.1e-69	Obscn_Mm_CAMK_Trio
ENSTRUP00000036208	0	Pkinase|24|286|3.4e-69	CaMK1b_Hs_CAMK_CAMK1
ENSTRUP00000036222	0	Pkinase|4|258|8.4e-88	NEK1_Mm_Other_NEK
ENSTRUP00000036335	0	Pkinase|62|312|3.5e-38	HIPK3_Mm_CMGC_DYRK
ENSTRUP00000036336	0	Pkinase|15|314|1.7e-49	IKKa_Mm_Other_IKK
ENSTRUP00000036351	0	Pkinase|4|254|2.6e-78	NEK3_Hs_Other_NEK
ENSTRUP00000036769	0	PBD|72|130|3.5e-31	Pkinase|256|507|1.4e-102	PAK3_Mm_STE_STE20
ENSTRUP00000036932	0	Pkinase|21|261|4.2e-78	QIK_Mm_CAMK_CAMKL
ENSTRUP00000036982	0	Pkinase|6|256|9.6e-79	AurC_Mm_Other_AUR
ENSTRUP00000037147	0	Pkinase|69|363|2.3e-72	MAP2K1_Hs_STE_STE7
ENSTRUP00000037463	0	Mad3_BUB1_I|1|100|2.7e-11	Pkinase|816|1089|3.1e-07	BUB1_Hs_Other_BUB
ENSTRUP00000037680	0	SH3_1|85|141|6.3e-29	SH3_2|86|141|7.1e-13	SH2|149|231|7.9e-43	Pkinase|271|520|3.3e-51	FYN_Hs_TK_Src
ENSTRUP00000037778	0	Pkinase|38|290|9e-93	POLO_box|399|462|9.7e-24	POLO_box|497|566|1e-35	PLK1_Hs_Other_PLK
ENSTRUP00000037832	0	Rad21_Rec8|117|167|0.0047	Pkinase|201|519|7.1e-41	Other_Unclassified
ENSTRUP00000037838	0	SH3_1|72|127|2.5e-19	SH3_2|73|127|7.5e-09	SH2|135|210|1.7e-34	Pkinase|250|501|2.6e-51	F_actin_bind|931|1103|1.8e-77	ABL_Mm_TK_Abl
ENSTRUP00000038153	0	DCX|82|146|5e-24	DCX|208|269|2.1e-24	Pkinase|384|640|9.7e-85	DCAMKL2_Mm_CAMK_DCAMKL
ENSTRUP00000038217	0	Pkinase|4|284|3.8e-102	ICK_Mm_CMGC_RCK
ENSTRUP00000038231	0	Pkinase|207|477|4.6e-55	Wnk3_Mm_Other_WNK
ENSTRUP00000038340	0	Pkinase|26|277|4.4e-94	MST2_Mm_STE_STE20
ENSTRUP00000038528	3	ig|220|283|0.031	I-set|310|402|0.00012	ig|321|387|1	Pkinase|585|941|2.6e-37	PDGFRa_Mm_TK_PDGFR
ENSTRUP00000038616	1	Pkinase|76|327|8.4e-83	NIM1_Mm_CAMK_CAMKL
ENSTRUP00000038629	0	Pkinase|25|289|2.2e-82	CNH|1005|1296|4.5e-106	HGK_Hs_STE_STE20
ENSTRUP00000038652	0	Pkinase|10|294|2.1e-74	CDK6_Mm_CMGC_CDK
ENSTRUP00000038692	0	I-set|3|89|5.4e-10	ig|17|74|0.11	V-set|125|216|0.028	I-set|126|215|3.2e-05	ig|140|200|0.27	fn3|219|308|1.5e-13	Pkinase|354|609|6.9e-84	V-set|689|781|0.00039	I-set|690|780|1.8e-35	ig|704|765|2.1e-08	smMLCK_Hs_CAMK_MLCK
ENSTRUP00000038813	2	I-set|205|301|0.00074	V-set|205|302|0.0007	Pkinase|579|913|4.2e-34	KIT_Mm_TK_PDGFR
ENSTRUP00000038828	0	Pkinase|25|287|1.8e-44	SBK_Mm_Other_NKF1
ENSTRUP00000038843	0	Pkinase|12|279|1.3e-35	PIM3_Mm_CAMK_PIM
ENSTRUP00000038938	0	Pkinase|25|285|7.7e-81	DRAK2_Hs_CAMK_DAPK
ENSTRUP00000039089	0	Pkinase|34|322|2.6e-88	ERK2_Mm_CMGC_MAPK
ENSTRUP00000039315	2	ig|45|101|1.4	ig|141|200|1.3	I-set|265|352|6e-05	ig|281|337|0.0017	ig|383|477|2.2	ig|534|615|0.054	I-set|638|725|3.3e-14	V-set|638|726|0.0069	ig|652|710|1.2e-12	Pkinase|756|1097|9e-26	FLT4_Mm_TK_VEGFR
ENSTRUP00000039547	1	Recep_L_domain|27|143|1.9e-42	Furin-like|157|312|1.4e-85	Recep_L_domain|329|444|6.6e-43	fn3|584|655|0.13	fn3|817|903|0.0081	Pkinase|983|1250|1.1e-34	IGF1R_Mm_TK_InsR
ENSTRUP00000039577	1	Activin_recp|27|99|0.00019	TGF_beta_GS|174|202|4e-15	Pkinase|204|491|1.7e-71	ALK2_Hs_TKL_STKR
ENSTRUP00000039753	0	Pkinase|13|230|2.2e-64	PHKg1_Mm_CAMK_PHK
ENSTRUP00000039873	0	Pkinase|62|322|2.1e-87	PDK1_Mm_AGC_PDK1
ENSTRUP00000039974	0	C1_1|139|191|2e-17	C1_3|150|181|0.0095	C1_1|255|307|1.3e-17	C1_3|266|297|0.025	PH|396|510|2.4e-06	Pkinase|550|808|1.2e-74	YrbL-PhoP_reg|550|739|0.034	PKD3_Hs_CAMK_PKD
ENSTRUP00000040115	0	Pkinase|2|210|3.8e-18	EphA5_Hs_TK_Eph
ENSTRUP00000040175	0	Pkinase|8|272|3.3e-56	CRIK_Hs_AGC_DMPK
ENSTRUP00000040177	0	Pkinase|13|229|1.4e-66	PHKg2_Mm_CAMK_PHK
ENSTRUP00000040262	1	V-set|1|99|0.0088	ig|13|82|0.12	ig|108|164|0.36	fn3|182|267|2.4e-13	fn3|279|362|0.0018	Pkinase|469|736|2.2e-34	AXL_Mm_TK_Axl
ENSTRUP00000040496	0	Pkinase|1|257|7e-84	DAPK1_Mm_CAMK_DAPK
ENSTRUP00000040685	0	Pkinase|599|936|2.5e-60	Pkinase_C|955|1011|0.00073	LATS2_Hs_AGC_NDR
ENSTRUP00000040780	0	Pkinase|4|287|1.5e-112	CDKL1_Mm_CMGC_CDKL
ENSTRUP00000041119	0	Pkinase|11|267|1.3e-93	CaMKII_AD|492|619|5.8e-87	CaMK2g_Hs_CAMK_CAMK2
ENSTRUP00000041275	0	Pkinase|1346|1678|0.00057	SgK269_Mm_Other_NKF3
ENSTRUP00000041441	0	Pkinase|669|955|4e-80	CRK7_Mm_CMGC_CDK
ENSTRUP00000041489	0	Pkinase|39|324|8.2e-99	CK2a2_Mm_CMGC_CK2
ENSTRUP00000041502	0	PBD|76|134|2.2e-31	Pkinase|256|507|7.2e-99	PAK3_Mm_STE_STE20
ENSTRUP00000041514	0	C1_1|35|87|8.2e-21	C1_1|100|152|6.6e-24	C1_3|111|142|0.0024	C2|171|258|9.9e-37	Pkinase|337|595|1.1e-77	Pkinase_C|615|660|5.1e-13	PKCa_Hs_AGC_PKC
ENSTRUP00000041556	0	Pkinase|28|281|3.2e-72	TAO3_Mm_STE_STE20
ENSTRUP00000041575	0	Pkinase|25|309|4.2e-85	p38a_Mm_CMGC_MAPK
ENSTRUP00000041607	0	Pkinase|74|340|4.5e-61	Pkinase_C|358|405|1e-10	PBD|379|463|0.23	YkyA|396|580|0.0087	M|443|463|5.8	M|531|551|59	M|604|624|15	M|744|764|34	M|779|799|11	DMPK_coil|865|925|7.6e-27	M|896|916|1e+02	C1_1|1008|1060|2.8e-09	PH|1078|1196|1.7e-08	CNH|1223|1496|1.2e-50	PBD|1561|1629|0.0031	MRCKb_Hs_AGC_DMPK
ENSTRUP00000041764	0	Pkinase|25|289|5.4e-84	TNIK_Hs_STE_STE20
ENSTRUP00000041766	0	Pkinase|63|314|1.9e-105	KA1|716|762|3.6e-22	MARK1_Hs_CAMK_CAMKL
ENSTRUP00000041781	0	C1_1|368|415|3e-05	Pkinase|647|910|6.2e-38	KSR2_Hs_TKL_RAF
ENSTRUP00000041798	0	Pkinase|409|700|1.4e-59	TLK2_Hs_Other_TLK
ENSTRUP00000041868	0	Pkinase|12|279|8.9e-32	PIM2_Mm_CAMK_PIM
ENSTRUP00000041870	0	Pkinase|12|275|1.4e-34	PIM3_Mm_CAMK_PIM
ENSTRUP00000041884	0	Pkinase|18|270|3e-99	AMPKa2_Mm_CAMK_CAMKL
ENSTRUP00000041917	0	Pkinase|15|313|2e-41	IKKb_Mm_Other_IKK
ENSTRUP00000042038	0	RGS|57|174|4.3e-31	Pkinase|190|455|5.6e-71	RHOK_Hs_AGC_GRK
ENSTRUP00000042206	0	Pkinase|80|630|1e-39	SRPK1_Mm_CMGC_SRPK
ENSTRUP00000042248	1	V-set|1|90|0.0033	ig|13|68|0.00023	I-set|126|214|9.6e-10	V-set|129|215|0.0012	ig|138|199|2.9e-07	I-set|222|325|8.6e-08	V-set|222|326|0.001	ig|237|310|0.00012	Pkinase|437|713|9.7e-40	FGFR2_Mm_TK_FGFR
ENSTRUP00000042432	0	Pkinase|15|301|3.6e-82	CDK6_Mm_CMGC_CDK
ENSTRUP00000042457	0	Pkinase|44|311|6.5e-38	gish_Dm_CK1_CK1
ENSTRUP00000042616	0	Pkinase|50|301|8.1e-67	NuaK1_Mm_CAMK_CAMKL
ENSTRUP00000042842	0	Death|20|104|0.014	Pkinase|203|377|9.3e-09	Irak2_Sp_TKL_IRAK
ENSTRUP00000042868	0	Kdo|10|210|0.0077	Pkinase|24|298|4.3e-37	APH|26|220|0.04	RRM_1|339|394|0.0098	KIS_Mm_Other_KIS
ENSTRUP00000042994	0	PBD|68|126|7.8e-30	Pkinase|263|514|1.7e-97	PAK3_Mm_STE_STE20
ENSTRUP00000043054	0	Pkinase|22|304|7.6e-77	MAPKAPK5_Hs_CAMK_MAPKAPK
ENSTRUP00000043105	1	Ephrin_lbd|11|186|1.5e-83	fn3|314|407|1.3e-07	fn3|425|509|1.5e-15	Pkinase|606|865|4.4e-43	SAM_2|901|968|2.2e-18	SAM_1|902|966|5.5e-27	EphB4_Mm_TK_Eph
ENSTRUP00000043194	0	SH2|386|466|3.7e-05	Pkinase|529|789|4.8e-10	Pkinase|833|1107|9.3e-46	JAK2_Hs_TK_JakA
ENSTRUP00000043300	0	Pkinase|39|312|1.6e-45	PTEN_C2|563|702|6e-39	DnaJ|1239|1297|0.0019	GAK_Mm_Other_NAK
ENSTRUP00000043347	0	Pkinase|24|280|2.2e-103	CaMK1a_Hs_CAMK_CAMK1
ENSTRUP00000043368	0	Pkinase|4|285|2e-91	PCTAIRE2_Mm_CMGC_CDK
ENSTRUP00000043399	0	Pkinase|12|266|1.3e-22	PIM3_Mm_CAMK_PIM
ENSTRUP00000043498	0	Pkinase|9|273|1.4e-45	C03C10.1_Ce_CK1_CK1
ENSTRUP00000043572	0	Pkinase|20|316|9.3e-92	ERK3_Mm_CMGC_MAPK
ENSTRUP00000043692	0	Pkinase|2|283|2e-70	CDKL5_Hs_CMGC_CDKL
ENSTRUP00000043743	0	SH3_1|13|69|9.7e-17	SH3_2|14|69|0.00018	SH2|83|157|4.4e-33	Pkinase|196|441|2.4e-44	CSK_Mm_TK_Csk
ENSTRUP00000043861	0	Sema|51|510|6e-35	PSI|528|571|6.1e-12	TIG|572|666|2e-19	TIG|669|751|1.4e-25	TIG|755|848|7e-16	Pkinase|1096|1355|1.1e-36	MET_Mm_TK_Met
ENSTRUP00000043876	0	Pkinase|9|226|4.5e-43	Other_Unclassified
ENSTRUP00000043882	0	Pkinase|20|292|2.3e-30	MPSK1_Mm_Other_NAK
ENSTRUP00000043884	0	Pkinase|26|297|4.2e-58	JNK3_Hs_CMGC_MAPK
ENSTRUP00000043925	0	Pkinase|91|312|9.9e-18	Other_Unclassified
ENSTRUP00000043944	0	Pkinase|12|275|6e-35	PIM3_Mm_CAMK_PIM
ENSTRUP00000044116	0	RGS|59|176|1.5e-25	Pkinase|192|458|5.9e-71	RHOK_Hs_AGC_GRK
ENSTRUP00000044171	0	Ephrin_lbd|29|204|3e-125	fn3|328|429|8.6e-06	fn3|444|525|5.5e-14	Pkinase|631|895|2.4e-30	SAM_2|920|987|1.3e-21	SAM_1|921|985|1.2e-25	EphB4_Mm_TK_Eph
ENSTRUP00000044427	0	Pkinase|1|210|3.7e-11	PYK2_Mm_TK_FAK
ENSTRUP00000044547	0	Pkinase|49|250|3.5e-44	5439_Tt_CAMK_CAMKL
ENSTRUP00000044576	0	Pkinase|20|270|1.1e-92	MST3_Mm_STE_STE20
ENSTRUP00000044762	0	Pkinase|17|291|6e-69	OSR1_Mm_STE_STE20
ENSTRUP00000044784	0	DCX|82|146|1.1e-21	DCX|209|270|2.5e-26	Pkinase|425|682|8.8e-99	DCAMKL2_Mm_CAMK_DCAMKL
ENSTRUP00000044816	0	PB1|39|119|0.0012	Pkinase|363|623|3.5e-76	MAP3K3_Hs_STE_STE11
ENSTRUP00000045084	0	Ank|66|99|2.8	Ank|100|132|7.7e-07	Ank|133|166|4.2e-05	Ank|167|199|3.2e-05	Ank|200|234|0.00052	Ank|235|269|0.026	Ank|270|303|0.0018	Ank|305|339|0.14	Ank|340|372|3.1e-09	Ank|382|414|0.78	Pkinase|463|719|8.8e-39	HH498_Hs_TKL_MLK
ENSTRUP00000045148	1	I-set|1|75|0.00017	V-set|1|76|0.006	ig|9|63|4.3e-07	C2-set_2|108|192|0.09	V-set|109|199|0.012	I-set|110|198|6e-13	ig|122|183|3e-06	I-set|206|309|2.5e-07	V-set|206|310|0.0045	ig|221|294|4.2e-06	Pkinase|422|698|7.6e-43	FGFR2_Mm_TK_FGFR
ENSTRUP00000045209	0	Pkinase|16|260|4.2e-66	SAM_2|336|408|5.8e-06	SAM_1|337|406|0.00071	ZAK_Mm_TKL_MLK
ENSTRUP00000045252	0	Pkinase|33|317|4.8e-71	MNK1_Hs_CAMK_MAPKAPK
ENSTRUP00000045616	0	Pkinase|421|699|2.6e-64	TLK1_Hs_Other_TLK
ENSTRUP00000045803	0	Pkinase|20|288|7.6e-84	PSKH1_Mm_CAMK_PSK
ENSTRUP00000045864	0	Pkinase|2|212|2.1e-20	RET_Mm_TK_Ret
ENSTRUP00000046093	0	Pkinase|8|272|2.1e-77	NEK2_Mm_Other_NEK
ENSTRUP00000046208	0	Pkinase|86|331|6.4e-09	NRBP1_Mm_Other_NRBP
ENSTRUP00000046275	0	FCH|1|98|1.6e-18	SH2|465|535|5.4e-24	Pkinase|566|819|1.7e-46	FES_Mm_TK_Fer
ENSTRUP00000046421	0	Pkinase|45|297|2.7e-40	TESK1_Mm_TKL_LISK
ENSTRUP00000046922	1	F5_F8_type_C|19|156|2.4e-32	Pkinase|567|839|1e-26	DDR2_Hs_TK_DDR
ENSTRUP00000047002	0	SH3_1|95|150|5.7e-22	SH3_2|96|150|1.5e-08	SH2|158|240|4.7e-38	Pkinase|277|526|2.7e-44	YES_Mm_TK_Src
ENSTRUP00000047120	0	Ephrin_lbd|32|210|2.9e-120	fn3|337|431|3e-12	fn3|449|533|7.9e-20	Pkinase|634|893|1e-39	SAM_2|910|977|3.1e-19	SAM_1|911|975|1.7e-24	EphB4_Mm_TK_Eph
ENSTRUP00000047212	0	Pkinase|17|269|2.2e-98	AMPKa1_Mm_CAMK_CAMKL
ENSTRUP00000047284	0	Pkinase|4|286|1.7e-114	CDK2_Hs_CMGC_CDK
ENSTRUP00000047295	1	EGF|100|131|0.11	EGF_2|104|131|0.034	EGF|148|178|2.5	EGF_2|148|178|2	EGF|191|220|3	EGF_2|195|220|0.0045	I-set|227|319|0.0093	fn3|322|405|0.0093	fn3|509|594|2.6e-15	Pkinase|697|965|1e-40	TIE1_Mm_TK_Tie
ENSTRUP00000047411	0	Pkinase|4|295|5.2e-92	APH|6|204|0.0018	Cdk4_Dm_CMGC_CDK
ENSTRUP00000047484	0	SH2|435|520|0.0002	Pkinase|578|844|3.7e-10	Pkinase|872|1146|8.7e-44	JAK1_Hs_TK_JakA
ENSTRUP00000047605	0	Pkinase|13|271|1.1e-99	CaMKII_AD|483|610|2.3e-83	CaMK2g_Hs_CAMK_CAMK2
ENSTRUP00000047699	0	RGS|20|136|0.0003	Pkinase|72|314|1.8e-53	Other_Unclassified
ENSTRUP00000047713	1	V-set|41|131|5.5e-07	I-set|42|130|1.4e-17	ig|54|115|3.1e-07	I-set|137|241|4.7e-06	V-set|141|242|0.00045	ig|153|226|1.8e-05	Pkinase|357|633|3.8e-45	FGFR2_Mm_TK_FGFR
ENSTRUP00000047973	0	Pkinase|11|296|6.9e-39	HIPK3_Mm_CMGC_DYRK
ENSTRUP00000047975	0	Pkinase|13|201|2e-40	CG4629_Dm_CAMK_CAMKL
ENSTRUP00000048035	0	Pkinase|27|344|6.5e-48	HIPK3_Mm_CMGC_DYRK
ENSTRUP00000048102	0	Ank|10|44|0.017	Ank|106|153|0.91	Pkinase|724|988|1e-78	MAP3K8_Mm_STE_STE11
ENSTRUP00000048226	0	Pkinase|24|338|2.7e-44	HIPK2_Mm_CMGC_DYRK
ENSTRUP00000048251	0	Pkinase|30|360|1.3e-34	HIPK2_Mm_CMGC_DYRK
ENSTRUP00000048277	0	Pkinase|26|311|8.9e-37	HIPK2_Mm_CMGC_DYRK
ENSTRUP00000048297	0	Pkinase|11|291|8.8e-41	HIPK3_Mm_CMGC_DYRK
ENSTRUP00000048393	0	Pkinase|25|358|1e-34	HIPK2_Mm_CMGC_DYRK
ENSTRUP00000048397	0	Pkinase|1|193|3.9e-09	Other_Unclassified
ENSTRUP00000048726	0	Pkinase|12|296|3.1e-19	HIPK2_Mm_CMGC_DYRK
ENSTRUP00000048750	0	Pkinase|16|237|2.8e-66	smMLCK_Hs_CAMK_MLCK
ENSTRUP00000048813	0	Pkinase|32|319|4.8e-46	HIPK2_Mm_CMGC_DYRK
ENSTRUP00000048836	0	Pkinase|24|309|5.2e-36	HIPK3_Mm_CMGC_DYRK
ENSTRUP00000048839	0	Pkinase|24|308|3.9e-33	HIPK2_Mm_CMGC_DYRK
ENSTRUP00000049090	0	Pkinase|6|219|1.1e-58	egl-4_Ce_AGC_PKG
ENSTRUP00000049160	0	Pkinase|11|291|1.4e-40	HIPK3_Mm_CMGC_DYRK
ENSTRUP00000049230	1	Pkinase|49|296|2.7e-31	HIPK2_Mm_CMGC_DYRK
ENSTRUP00000049272	0	Pkinase|15|273|3.1e-19	HIPK2_Mm_CMGC_DYRK
ENSTRUP00000049342	0	Pkinase|1|183|1.1e-05	Other_Unclassified
ENSTRUP00000049360	0	Pkinase|25|340|2.8e-33	HIPK2_Mm_CMGC_DYRK
ENSTRUP00000049388	0	Pkinase|10|220|4.9e-58	24887_Tt_Other_ULK
ENSTRUP00000049398	0	Pkinase|26|317|3.6e-28	HIPK3_Mm_CMGC_DYRK
ENSTRUP00000049469	0	Kdo|20|209|0.0068	Pkinase|24|309|5.4e-35	HIPK2_Mm_CMGC_DYRK
ENSTRUP00000049587	0	Pkinase|18|312|3.9e-34	HIPK2_Mm_CMGC_DYRK
ENSTRUP00000049592	0	Kdo|20|201|0.047	Pkinase|24|297|3.7e-11	HIPK3_Mm_CMGC_DYRK
ENSTRUP00000049770	0	Kdo|20|209|0.0072	Pkinase|24|309|8.2e-31	HIPK2_Mm_CMGC_DYRK
ENSTRUP00000049983	0	Pkinase|5|217|6.5e-14	CG17090_Dm_CMGC_DYRK
ENSTRUP00000050053	0	Pkinase|1|246|6.9e-14	CG17090_Dm_CMGC_DYRK
ENSTRUP00000050116	1	Pkinase|1|206|2.6e-10	CG17090_Dm_CMGC_DYRK
ENSTRUP00000050131	0	Pkinase|15|221|4.5e-10	HIPK2_Mm_CMGC_DYRK
ENSTRUP00000050178	0	Pkinase|1|217|2.3e-23	FYN_Hs_TK_Src
ENSTRUP00000050229	0	Pkinase|1|212|1.3e-15	FRK_Hs_TK_Src
ENSTRUP00000050260	0	Pkinase|24|346|3.8e-50	HIPK2_Mm_CMGC_DYRK
ENSTRUP00000050329	0	Pkinase|1|246|2.1e-22	ACTR2_Hs_TKL_STKR
ENSTRUP00000050330	1	Pkinase|1|211|3.2e-51	CaMK2g_Hs_CAMK_CAMK2
ENSTRUP00000050573	0	Pkinase|1|244|5.1e-24	BMPR1B_Mm_TKL_STKR
ENSTRUP00000050819	1	Pkinase|118|417|4.1e-47	TGFBR2_Mm_TKL_STKR
ENSTRUP00000050986	0	Pkinase|13|216|1.3e-15	TTN_Mm_CAMK_MLCK
ENSTRUP00000051011	0	Pkinase|500|761|1.4e-50	Ribonuc_2-5A|766|892|1e-73	IRE1_Mm_Other_IRE
[truncated: 206 more columns]
