# Supplementary material for: Repertoire of Protein Kinases Encoded in the Genome of Takifugu rubripes
Source: Comp Funct Genomics. 2012 May 14;2012:258284. doi: 10.1155/2012/258284 (PMC3359783; doi:10.1155/2012/258284)
Supplement: Supplementary file 2 [file 258284.f2.xls]

## Sheet: Sheet1
Supplementary file 2: Population of kinase subfamilies in fugu expressed in percentages.
Highly represented and lowly represented subfamilies in Fugu are highlighted in red and blue respectively
	TK
	DDR	EGFR	FGFR	JakA	InsR	Lmr	Sev	Trk	PDGFR	Ror	JakB	TK-Unique	Abl	Ack	Alk	Axl	CCK4	Csk	Eph	FAK	Fer	KIN16	KIN6	Met	Musk	Ret	Ryk	Src	Syk	Tec	Tie	Kin-16	Kin-9	TK-Sp1	FGFR-l	FGGAP	FYVE-TK	HMD	LDLR-like	LRR-TK	LRR-TK-Dual	RM1	SFK-Abl	TK10	TK11	TK12	TK2	TK3	TK4
yeast	0	0	0	0	0	0	0	0	0	0	0	0	0	0	0	0	0	0	0	0	0	0	0	0	0	0	0	0	0	0	0	0	0	0	0	0	0	0	0	0	0	0	0	0	0	0	0	0	0
human	3.39	2.54	16.95	0.85	2.54	0	0.85	2.54	4.24	1.69	0	0	3.39	1.69	1.69	3.39	3.39	3.39	11.02	5.08	1.69	0	0	1.69	0.85	3.39	0.85	11.86	1.69	4.24	1.69	0	0	0	0	0	0	0	0	0	0	0	0	0	0	0	0	0	0
fugu	3.09	2.06	5.15	5.15	4.12	2.06	0	4.12	7.22	2.06	0	0	2.06	3.09	0	3.09	0	2.06	19.59	4.12	3.09	0	0	3.09	1.03	1.03	1.03	15.46	2.06	2.06	2.06	0	0	0	0	0	0	0	0	0	0	0	0	0	0	0	0	0	0
C.elegans	2.9	1.45	1.45	0	0	0	0	0	0	1.45	0	0	1.45	2.9	0	0	0	0	1.45	0	52.17	17.39	8.7	2.9	0	0	1.45	1.45	1.45	0	0	0	0	0	0	0	0	0	0	0	0	0	0	0	0	0	0	0	0
Drosophila	0	2.94	11.76	2.94	2.94	0	2.94	0	2.94	2.94	0	0	2.94	8.82	2.94	0	2.94	2.94	5.88	2.94	5.88	0	0	0	2.94	2.94	8.82	11.76	2.94	2.94	0	0	0	0	0	0	0	0	0	0	0	0	0	0	0	0	0	0	0
	TKL
	LISK	LRRK	MLK	RIPK	STKR	TKL-Unique	IRAK	RAF	ARK	ARMK	CZAK	Dicty5	DPYK	Gdt	Dicty4	TKL-ciliate1	TKL-ciliate2	TKL-Sp1
yeast	0	0	0	0	0	0	0	0	0	0	0	0	0	0	0	0	0	0
human	4.76	2.38	30.95	9.52	38.1	0	2.38	11.9	0	0	0	0	0	0	0	0	0	0
fugu	10.53	2.63	23.68	7.89	36.84	0	2.63	15.79	0	0	0	0	0	0	0	0	0	0
C.elegans	0	9.09	45.45	0	27.27	0	9.09	9.09	0	0	0	0	0	0	0	0	0	0
Drosophila	14.29	7.14	28.57	0	35.71	0	0	14.29	0	0	0	0	0	0	0	0	0	0
	AGC
	AKT	DMPK	PKA	PKC	PKG	PKN	SGK	AGC-Unique	YANK	GRK	MAST	NDR	PDK1	RSK	RSKL	RSKR	AktR
yeast	18.75	0	18.75	6.25	0	0	0	0	0	0	0	18.75	18.75	18.75	0	0	0
human	5.88	10.29	11.76	13.24	2.94	4.41	7.35	0	2.94	11.76	5.88	5.88	2.94	14.71	0	0	0
fugu	7.14	10	7.14	17.14	8.57	5.71	7.14	0	0	11.43	5.71	5.71	1.43	12.86	0	0	0
C.elegans	10.81	5.41	13.51	16.22	5.41	5.41	0	0	2.7	5.41	2.7	5.41	5.41	18.92	0	2.7	0
Drosophila	5.26	7.89	7.89	13.16	18.42	5.26	0	0	0	2.63	5.26	5.26	15.79	7.89	2.63	2.63	0
	CAMK
	CAMKL	CAMK1	CAMK2	MAPKAPK	MLCK	Trbl	PKD	CAMK-Unique	CASK	DAPK	DCAMKL	PHK	PIM	PSK	RAD53	RSKb	Trio	TSSK	CDPK	CAMK-Tt
yeast	54.17	20.83	0	0	0	0	0	0	0	0	4.17	0	0	0	8.33	0	0	0	0	0
human	22.68	6.19	20.62	9.28	13.4	0	3.09	0	1.03	6.19	3.09	2.06	3.09	1.03	2.06	0	2.06	4.12	0	0
fugu	30.23	8.14	6.98	5.81	9.3	2.33	4.65	0	0	6.98	4.65	0	9.3	2.33	0	0	6.98	0	0	0
C.elegans	30.95	2.38	4.76	7.14	16.67	0	11.9	0	2.38	2.38	2.38	0	4.76	2.38	2.38	0	0	9.52	0	0
Drosophila	44.12	2.94	8.82	11.76	11.76	0	0	0	2.94	2.94	0	5.88	0	0	2.94	0	0	5.88	0	0
	CK1
	CK1	Worm10	Worm11	Worm6	Worm7	Worm8	Worm9	CK1-Unique	TTBKL	VRK	Dual	TTBK
yeast	100	0	0	0	0	0	0	0	0	0	0	0
human	81.82	0	0	0	0	0	0	0	0	0	0	18.18
fugu	75	0	0	0	0	0	0	0	0	0	0	25
C.elegans	3.08	3.08	0	32.31	4.62	1.54	3.08	0	43.08	1.54	6.15	1.54
Drosophila	91.67	0	0	0	0	0	0	0	0	8.33	0	0
	CMGC
	CK2	CDK	CDKL	MAPK	CMGC-Unique	CLK	DYRK	GSK	RCK	SRPK	Dicty1
yeast	9.09	31.82	0	27.27	0	4.55	4.55	13.64	4.55	4.55	0
human	2.61	34.78	4.35	27.83	0	5.22	16.52	1.74	3.48	3.48	0
fugu	2.15	20.43	6.45	18.28	0	2.15	43.01	2.15	3.23	2.15	0
C.elegans	1.89	33.96	0	26.42	0	5.66	13.21	11.32	1.89	5.66	0
Drosophila	2.78	41.67	2.78	16.67	0	5.56	13.89	5.56	2.78	8.33	0
	Other
	CAMKK	IKK	Slob	NKF1	NKF2	NKF3	NKF4	NKF5	PLK	Worm1	Worm2	Worm3	Worm4	Worm5	Other-Unique	Aur	BUB	Bud32	CDC7	HAL	Haspin	IRE	MOS	NAK	NEK	NRBP	PEK	RAN	SCY1	TBCK	TLK	TOPK	TTK	ULK	VPS15	WEE	Wnk	Dicty10	Dicty6	Dicty7	Dicty8	Dicty9	SAMK	IKS	urch	Ciliate-A1	Ciliate-A2	Ciliate-A3	Ciliate-A4
yeast	10.71	0	0	0	0	0	0	0	3.57	0	0	0	0	0	0	3.57	3.57	0	0	28.57	0	3.57	0	14.29	3.57	0	3.57	10.71	0	0	0	0	0	3.57	3.57	3.57	0	0	0	0	0	0	0	3.57	0	0	0	0	0
human	12.99	5.19	0	2.6	1.3	2.6	2.6	0	5.19	0	0	0	0	0	0	10.39	1.3	0	1.3	0	0	2.6	1.3	6.49	15.58	0	3.9	0	1.3	0	2.6	0	1.3	5.19	0	3.9	5.19	0	0	0	0	0	0	0	0	0	0	0	0
fugu	1.64	6.56	0	6.56	1.64	1.64	6.56	0	6.56	0	0	0	0	0	0	3.28	1.64	1.64	0	0	0	1.64	3.28	4.92	11.48	1.64	3.28	0	3.28	0	6.56	1.64	1.64	6.56	1.64	3.28	6.56	0	0	0	0	0	0	0	0	0	0	0	0
C.elegans	2.78	0	0	0	2.78	0	0	0	5.56	2.78	2.78	2.78	0	8.33	0	5.56	2.78	0	2.78	0	13.89	2.78	0	8.33	11.11	0	5.56	0	2.78	2.78	2.78	0	0	2.78	2.78	2.78	2.78	0	0	0	0	0	0	0	0	0	0	0	0
Drosophila	3.03	6.06	0	6.06	3.03	0	0	0	6.06	0	0	0	0	0	0	6.06	6.06	0	6.06	0	0	3.03	3.03	12.12	9.09	0	6.06	0	3.03	0	6.06	0	3.03	9.09	0	3.03	0	0	0	0	0	0	0	0	0	0	0	0	0
	STE
	STE7	STE11	STE20	STE-Unique	Dicty2	Dicty3
yeast	28.57	28.57	42.86	0	0	0
human	25	17.31	57.69	0	0	0
fugu	7.69	20.51	71.79	0	0	0
C.elegans	13.64	45.45	40.91	0	0	0
Drosophila	22.22	11.11	66.67	0	0	0
Percentage of a subfamily=Number of sequences belonging to a subfamily/Number of sequences in the respective group to which the subfamily belongs
[truncated: 30 more columns]
