# Supplementary material for: Repertoire of Protein Kinases Encoded in the Genome of Takifugu rubripes
Source: Comp Funct Genomics. 2012 May 14;2012:258284. doi: 10.1155/2012/258284 (PMC3359783; doi:10.1155/2012/258284)
Supplement: Supplementary file 4 [file 258284.f4.xls]

## Sheet: Supplementary_file_4
Supplementary file 4: Results of BL:AST search for each of fugu protein kinase sequences belonging to DYRK subfamily
Gene identification number of fugu	uniprot id of hit	% identity	alignment length	e-value
ENSTRUP00000049398_FUGU	sp|O88850|HIPK3_RAT	39.33	328	2e-59
ENSTRUP00000049587_FUGU	sp|Q9H2X6|HIPK2_HUMAN	33.84	331	2e-42
ENSTRUP00000008133_FUGU	sp|Q92630|DYRK2_HUMAN	82.17	314	3e-162
ENSTRUP00000048226_FUGU	sp|Q9WUM7|HIPK2_MESAU	39.05	338	2e-59
ENSTRUP00000004225_FUGU	sp|Q9H422|HIPK3_HUMAN	83.89	329	3e-163
ENSTRUP00000049770_FUGU	sp|Q9H422|HIPK3_HUMAN	35.91	337	1e-54
ENSTRUP00000048393_FUGU	sp|O88904|HIPK1_MOUSE	37.64	356	5e-52
ENSTRUP00000048297_FUGU	sp|Q9WUM7|HIPK2_MESAU	33.74	329	3e-49
ENSTRUP00000048813_FUGU	sp|Q9WUM7|HIPK2_MESAU	36.98	338	3e-54
ENSTRUP00000049160_FUGU	sp|Q9WUM7|HIPK2_MESAU	34.04	329	1e-49
ENSTRUP00000048839_FUGU	sp|Q9H422|HIPK3_HUMAN	36.8	337	3e-53
ENSTRUP00000026597_FUGU	sp|Q9H422|HIPK3_HUMAN	37.69	329	4e-56
ENSTRUP00000003716_FUGU	sp|Q8BI55|DYRK4_MOUSE	73.06	297	3e-139
ENSTRUP00000049272_FUGU	sp|Q86Z02|HIPK1_HUMAN	40.24	251	8e-43
ENSTRUP00000048726_FUGU	sp|Q9H422|HIPK3_HUMAN	36.17	329	2e-49
ENSTRUP00000011300_FUGU	sp|Q9QZR5|HIPK2_MOUSE	91.49	329	0
ENSTRUP00000010048_FUGU	sp|O88850|HIPK3_RAT	82.67	329	1e-161
ENSTRUP00000048277_FUGU	sp|Q9WUM7|HIPK2_MESAU	35.31	337	9e-55
ENSTRUP00000048836_FUGU	sp|Q9H422|HIPK3_HUMAN	37.69	329	2e-57
ENSTRUP00000049230_FUGU	sp|A4L9P5|HIPK1_RAT	40.4	250	7e-46
ENSTRUP00000000225_FUGU	sp|Q9H422|HIPK3_HUMAN	35.29	340	7e-47
ENSTRUP00000047973_FUGU	sp|O88904|HIPK1_MOUSE	34.04	329	7e-50
ENSTRUP00000032983_FUGU	sp|Q9QZR5|HIPK2_MOUSE	34.85	330	9e-46
ENSTRUP00000049469_FUGU	sp|Q9H422|HIPK3_HUMAN	36.5	337	5e-56
ENSTRUP00000049592_FUGU	sp|O88904|HIPK1_MOUSE	33.64	330	5e-37
ENSTRUP00000009230_FUGU	sp|Q63470|DYR1A_RAT	90.34	321	6e-179
ENSTRUP00000016634_FUGU	sp|Q92630|DYRK2_HUMAN	92.04	314	1e-176
ENSTRUP00000016857_FUGU	sp|Q63470|DYR1A_RAT	95.95	321	0
ENSTRUP00000036335_FUGU	sp|Q99558|M3K14_HUMAN	54.2	238	1e-67
ENSTRUP00000018740_FUGU	sp|Q99558|M3K14_HUMAN	52.74	237	3e-66
ENSTRUP00000020840_FUGU	sp|Q9H2X6|HIPK2_HUMAN	97.57	329	0
ENSTRUP00000027188_FUGU	sp|Q86Z02|HIPK1_HUMAN	90.88	329	0
ENSTRUP00000048035_FUGU	sp|O88904|HIPK1_MOUSE	36.87	339	1e-56
ENSTRUP00000048251_FUGU	sp|Q86Z02|HIPK1_HUMAN	37.72	342	1e-52
ENSTRUP00000049360_FUGU	sp|Q86Z02|HIPK1_HUMAN	38.53	340	4e-53
ENSTRUP00000049983_FUGU	sp|Q3V016|HIPK4_MOUSE	38.1	210	3e-34
ENSTRUP00000050053_FUGU	sp|Q9QZR5|HIPK2_MOUSE	30.16	315	6e-33
ENSTRUP00000050116_FUGU	sp|Q9H2X6|HIPK2_HUMAN	39.05	210	5e-34
ENSTRUP00000050131_FUGU	sp|O88904|HIPK1_MOUSE	36.09	266	1e-33
ENSTRUP00000050260_FUGU	sp|Q9WUM7|HIPK2_MESAU	38.79	348	5e-65
